# Supplementary material for: Cycloisomerization of dienes and enynes catalysed by a modified ruthenium carbene species
Source: Royal Society of Chemistry journal article supplement (doi:10.1039/c2ob07185a), 2012-01-01

## **Cycloisomerization of dienes and enynes catalysed by a modified ruthenium carbene species**

*Álvaro Mallagaray, Kazem Mohammadiannejad-Abbasabadi, Sandra Medina, Gema Domínguez, and Javier Pérez-Castells\**

Facultad de Farmacia, Dpto. Química, Universidad San Pablo CEU,  
Urb. Montepríncipe, ctra. Boadilla km 5,300  
Boadilla del Monte, 28668 Madrid, Spain

## **SPECTRA OF NEW PRODUCTS**

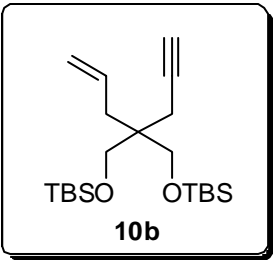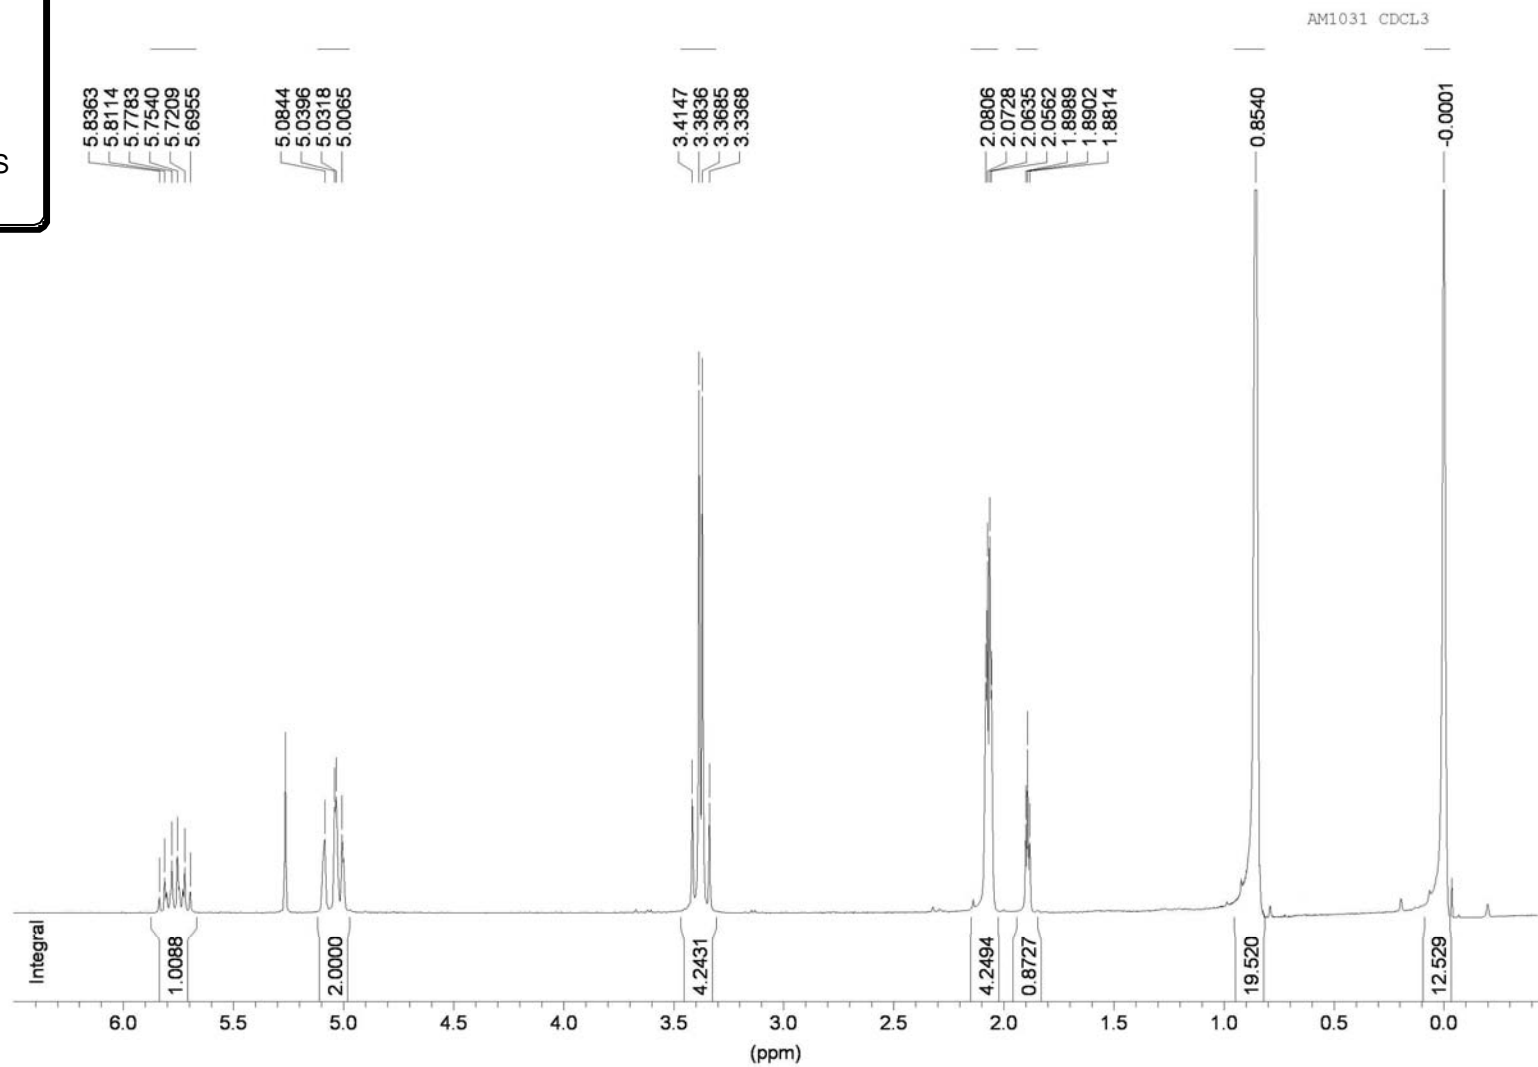

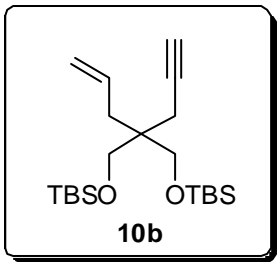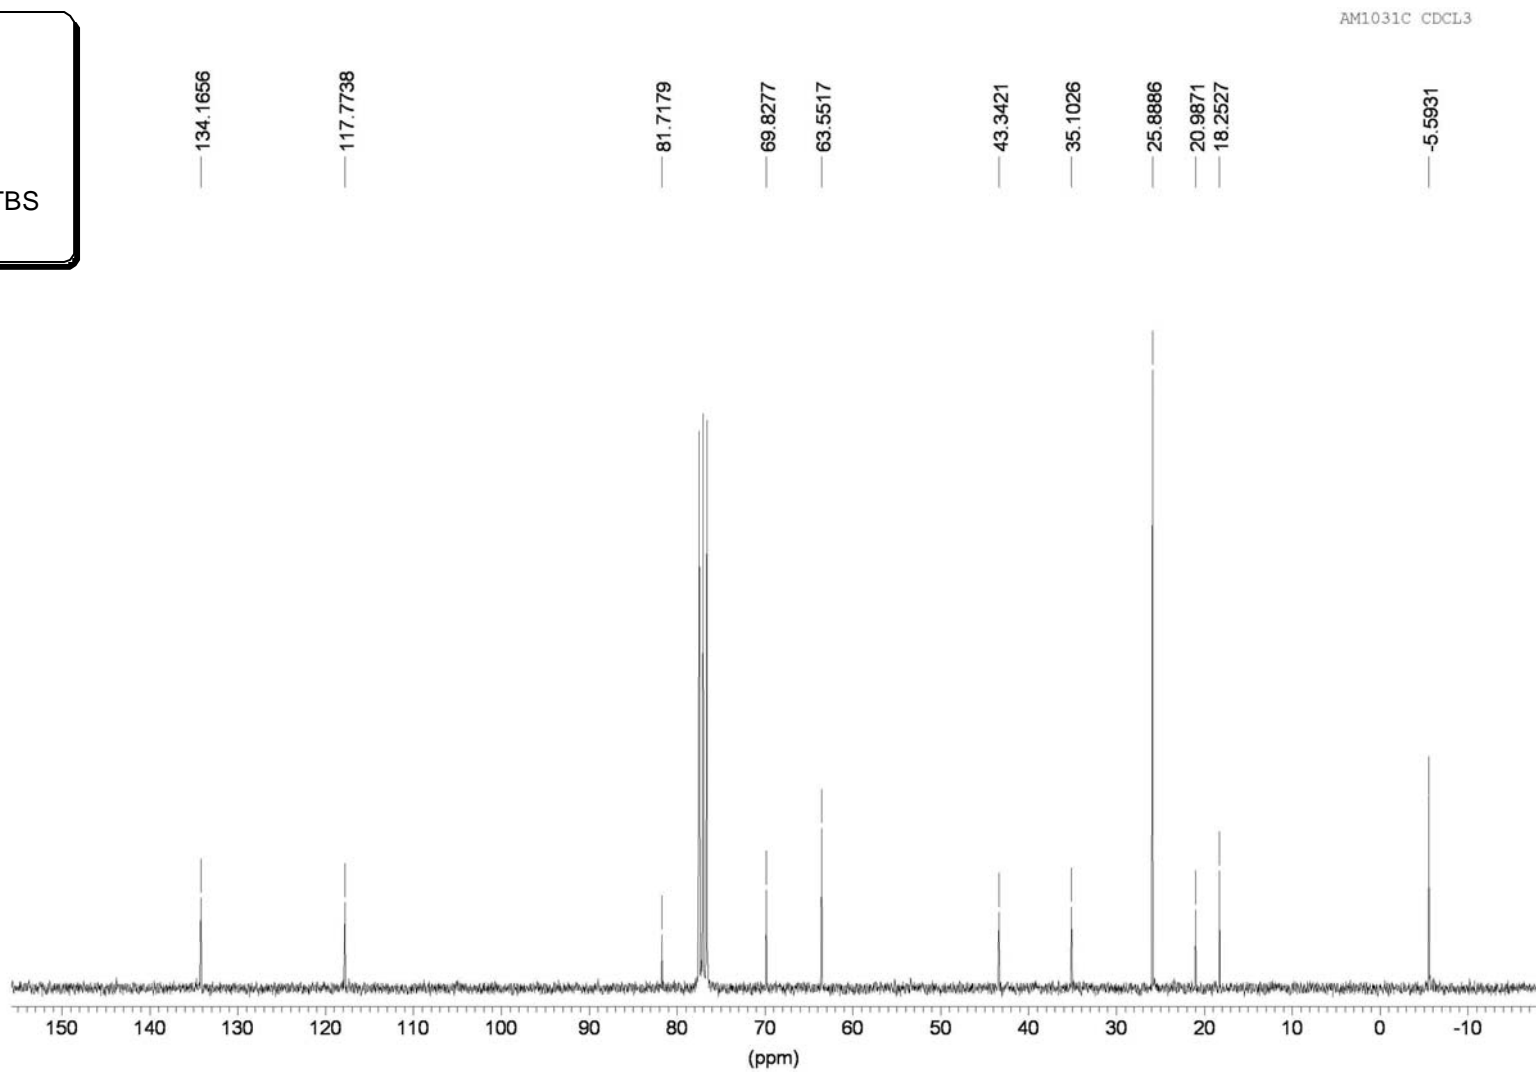

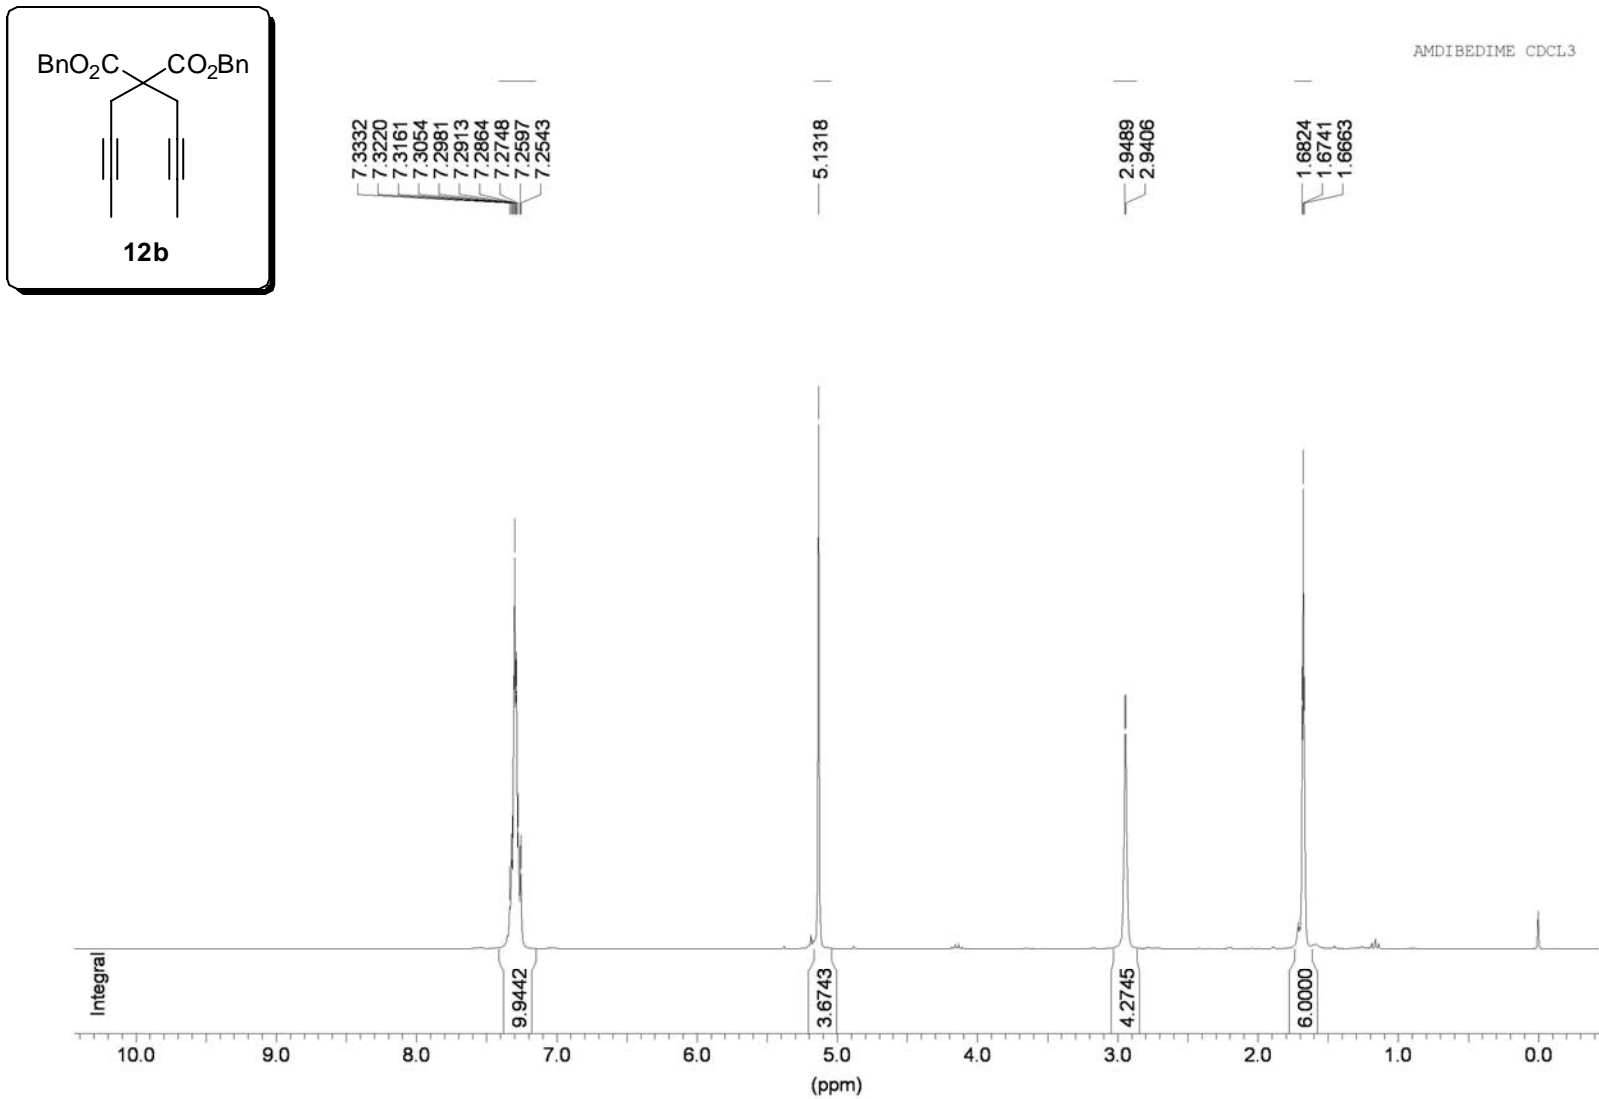

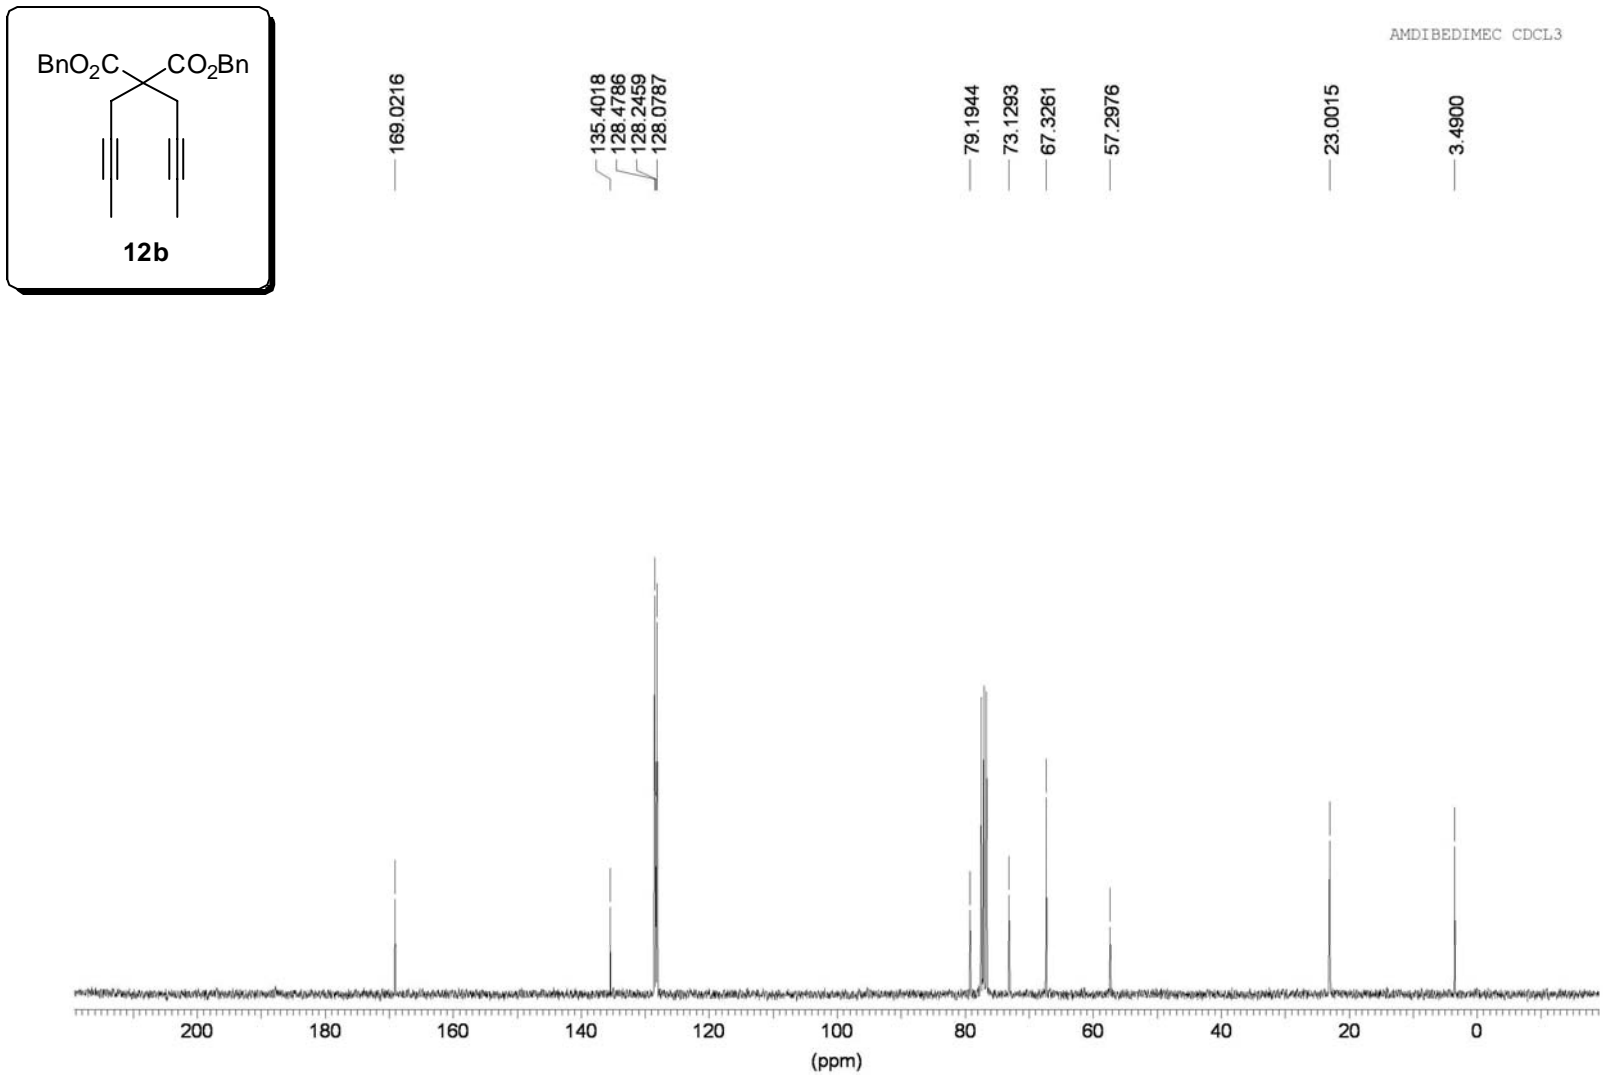

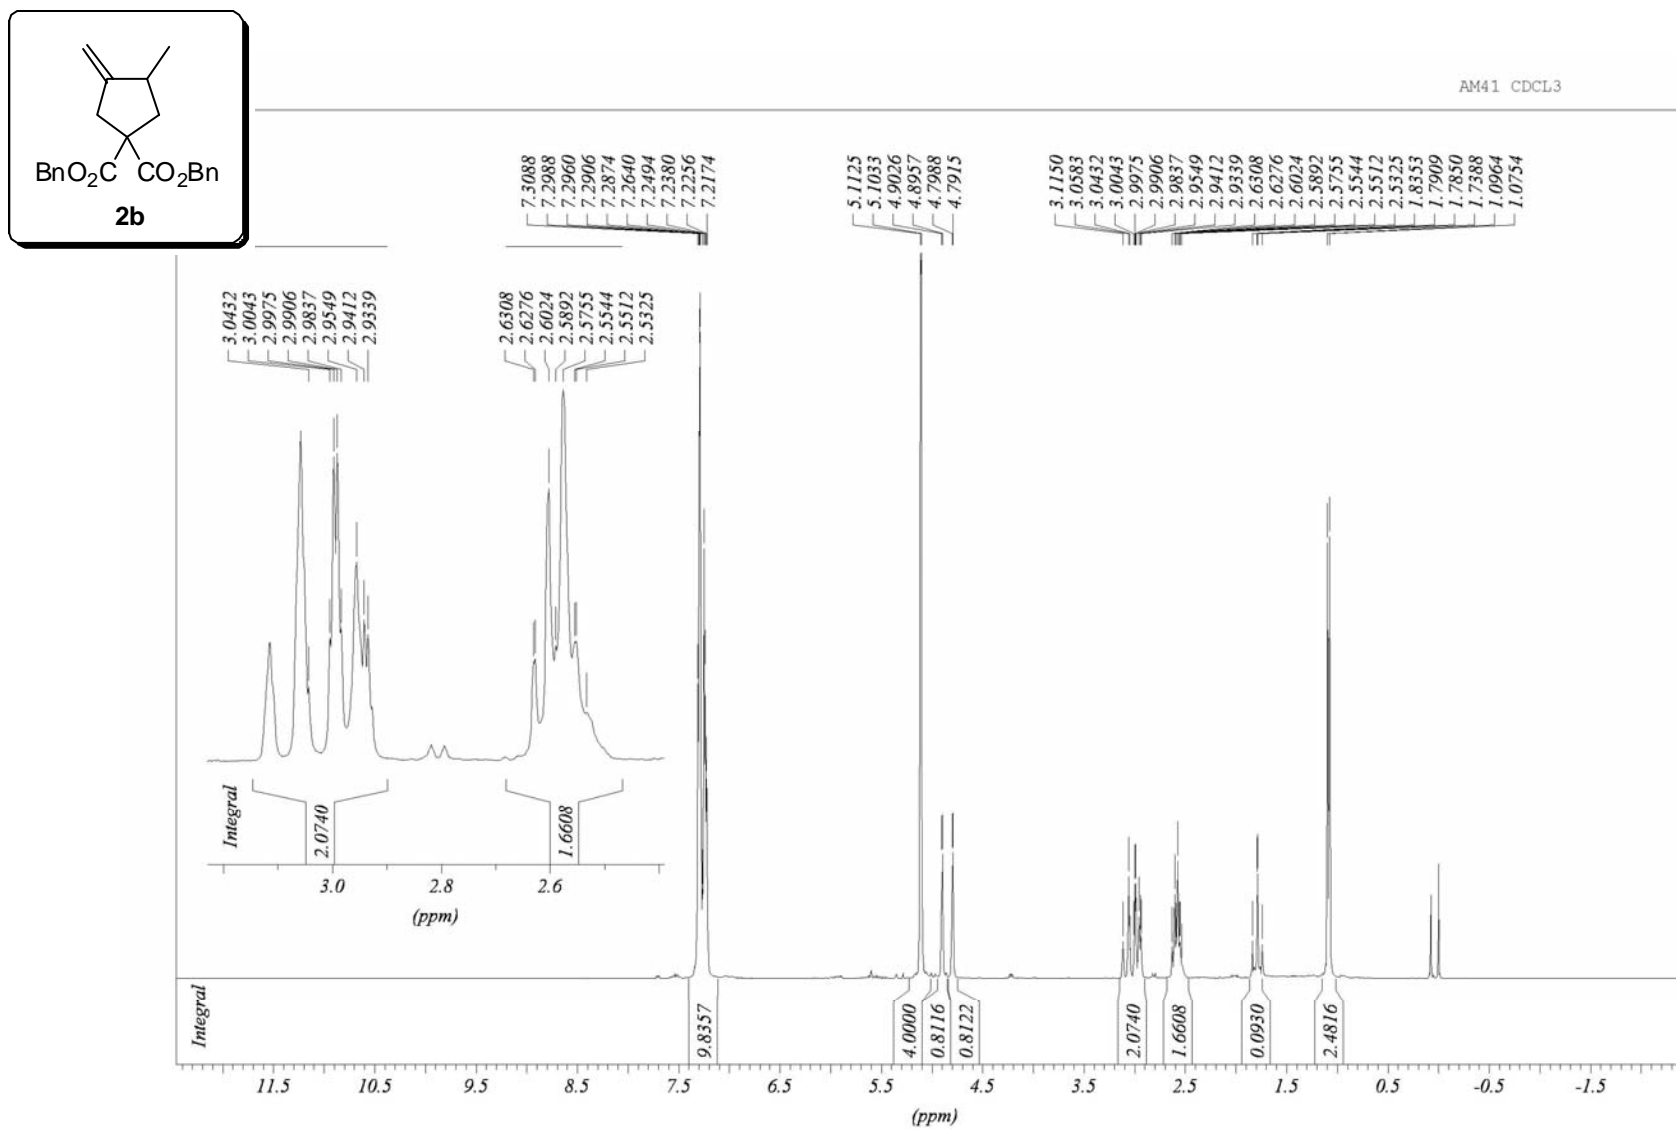

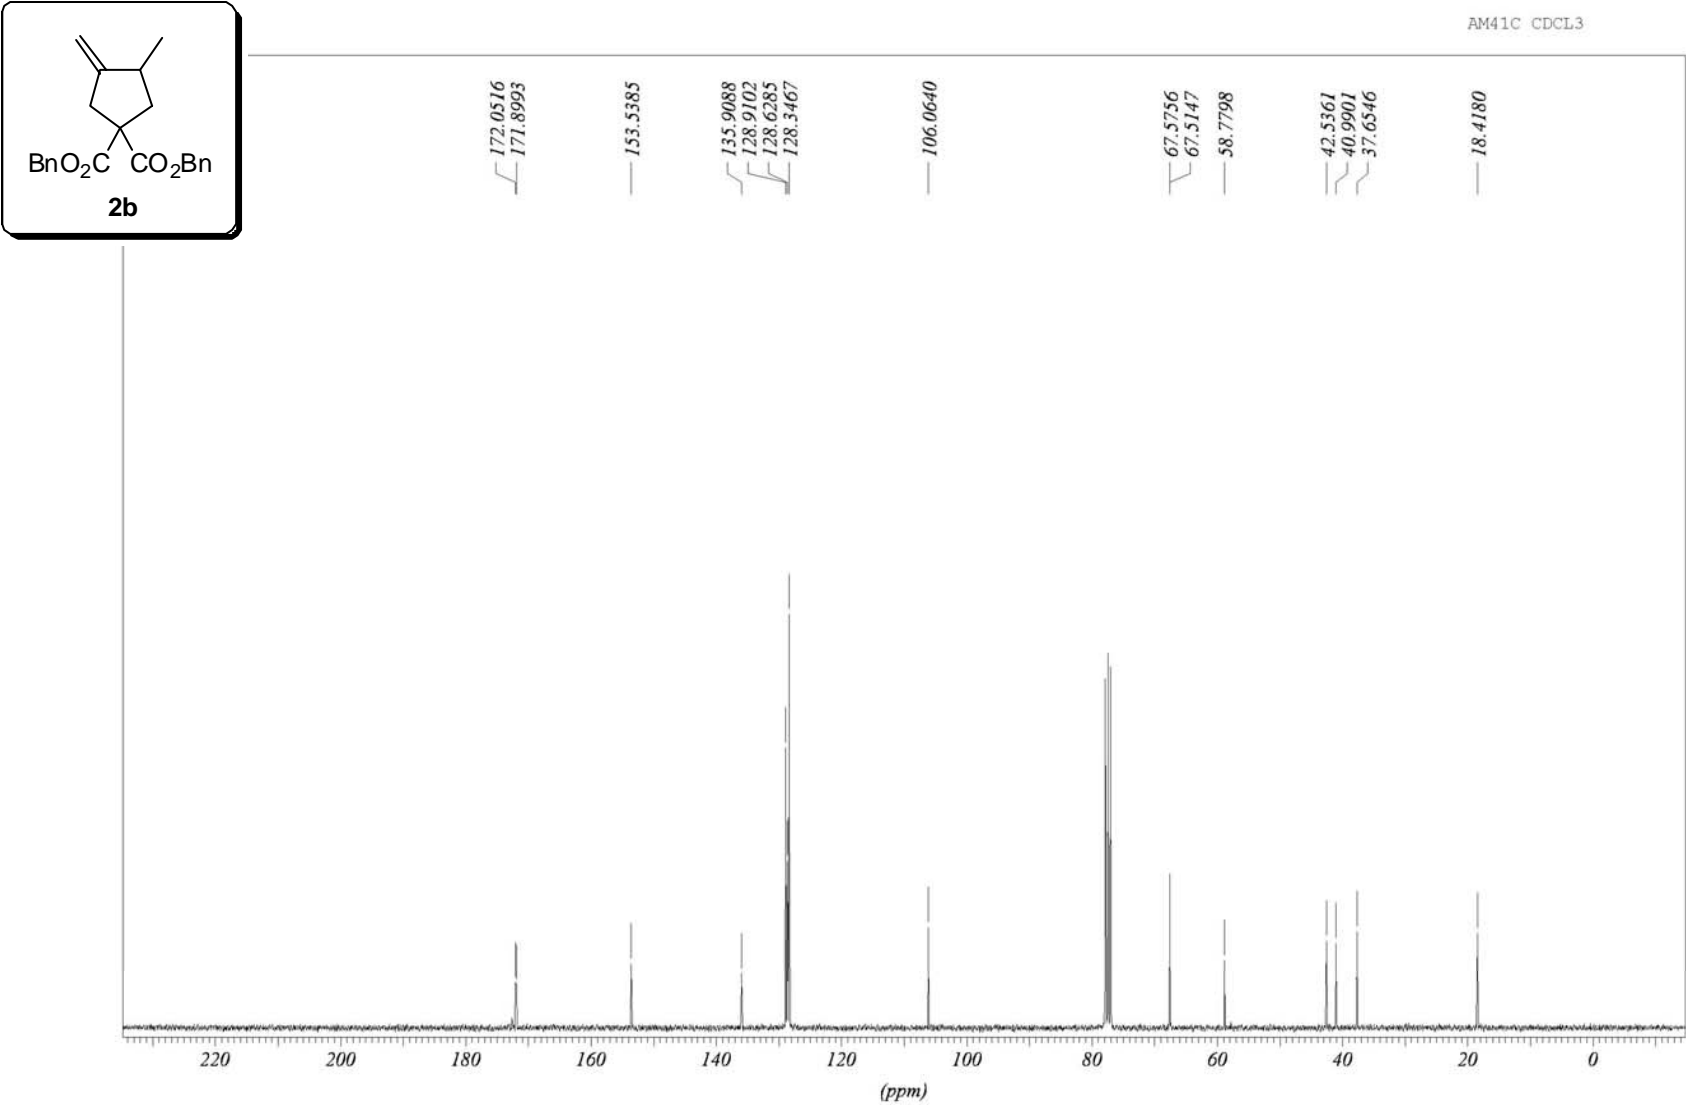

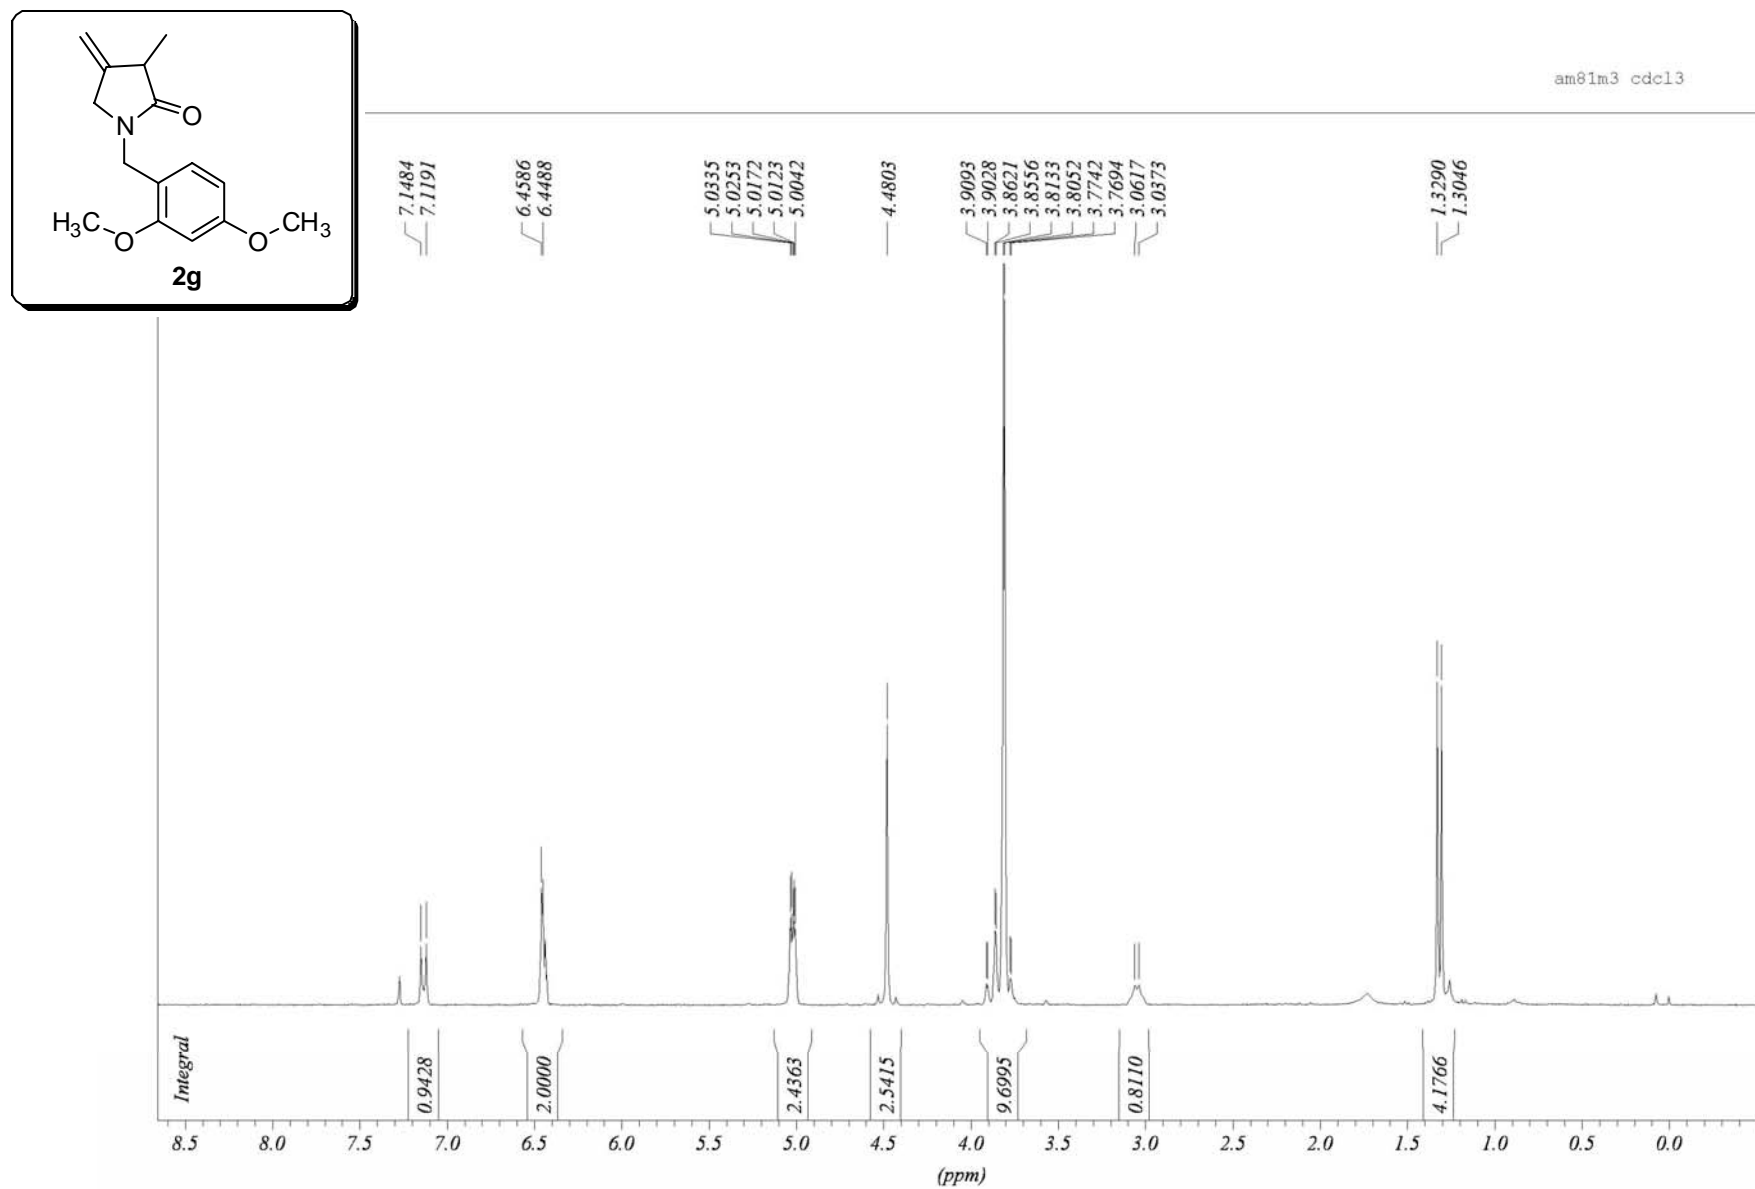



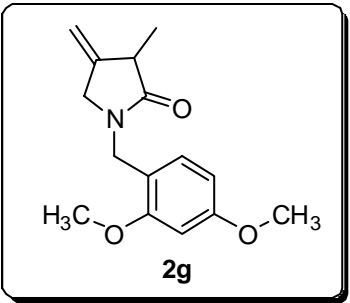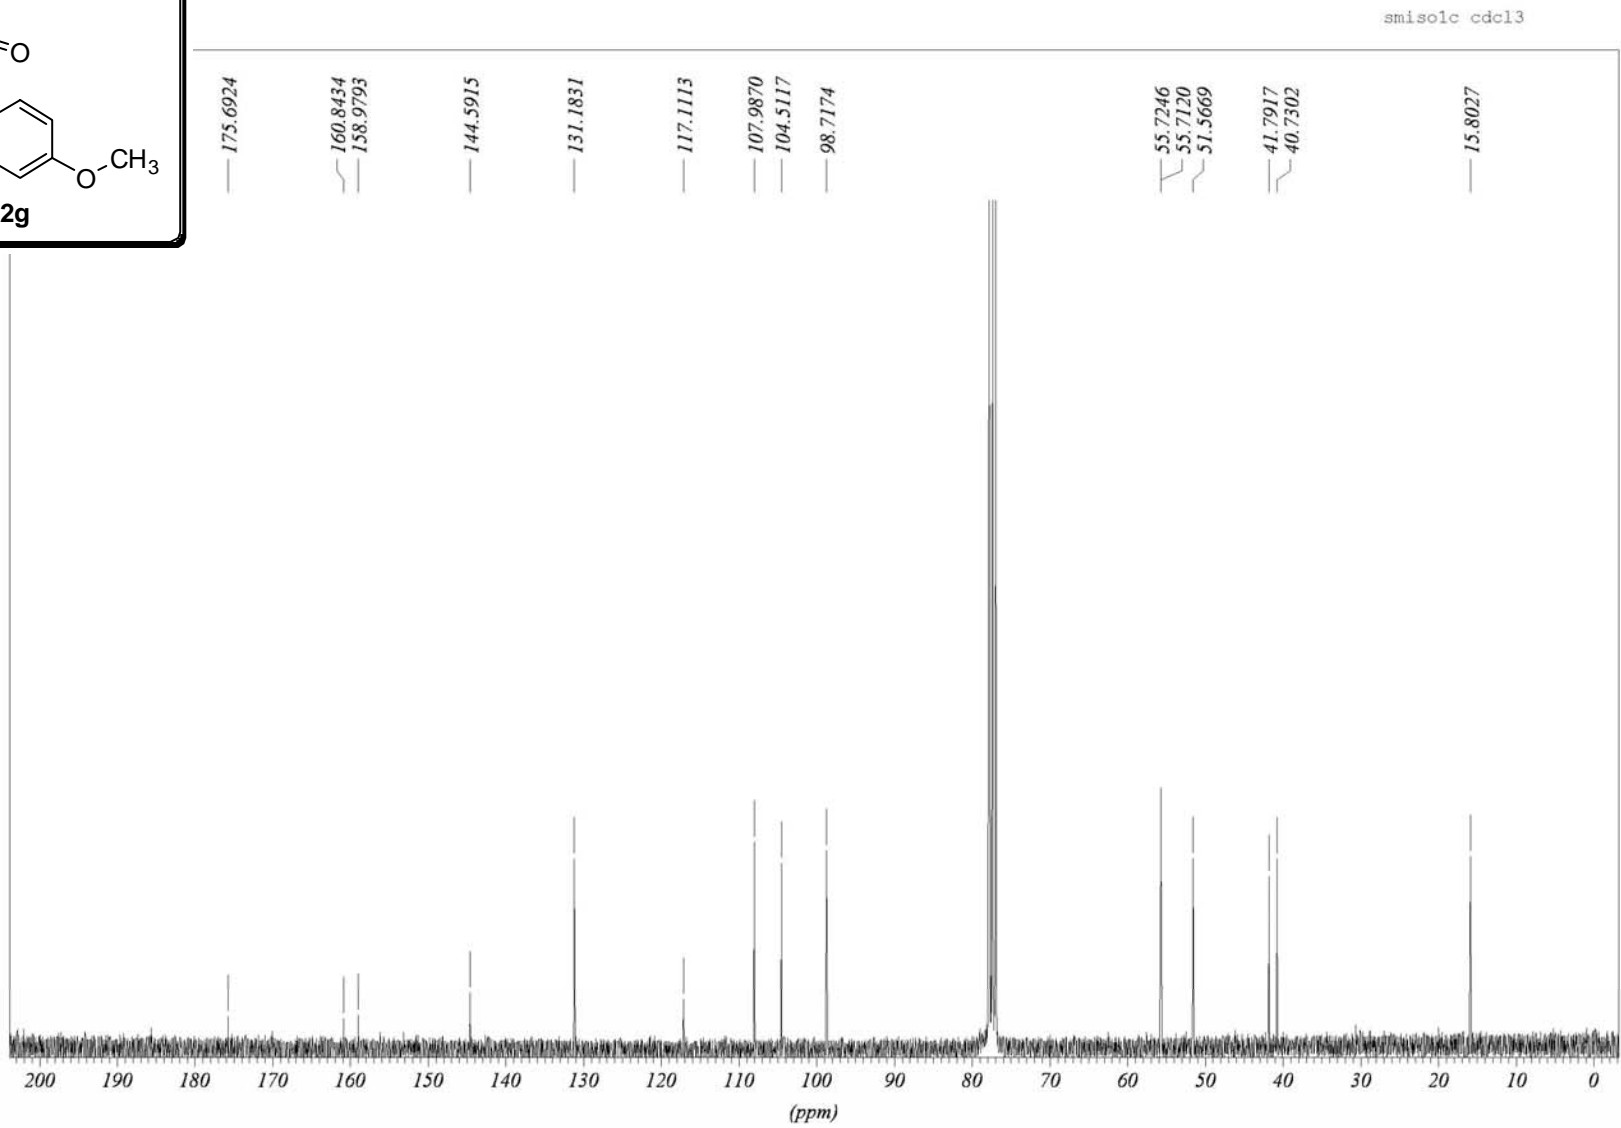

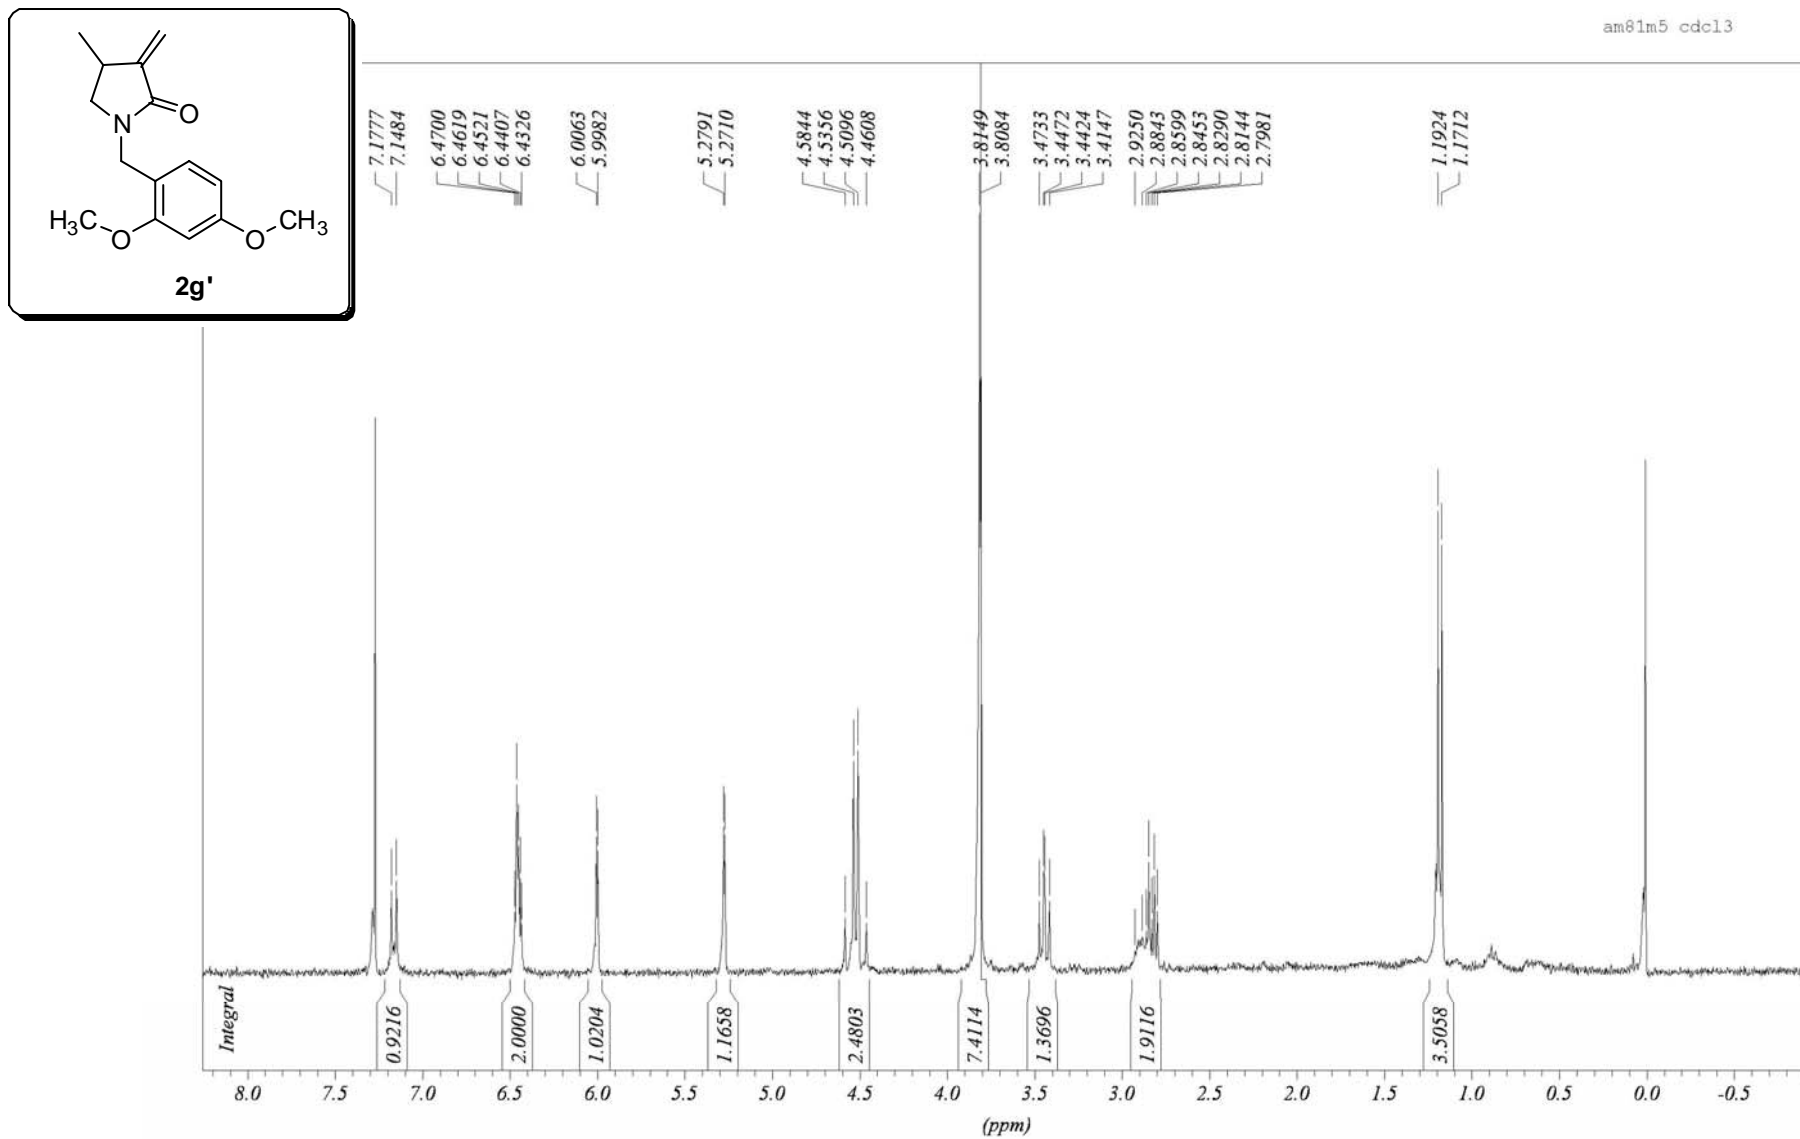

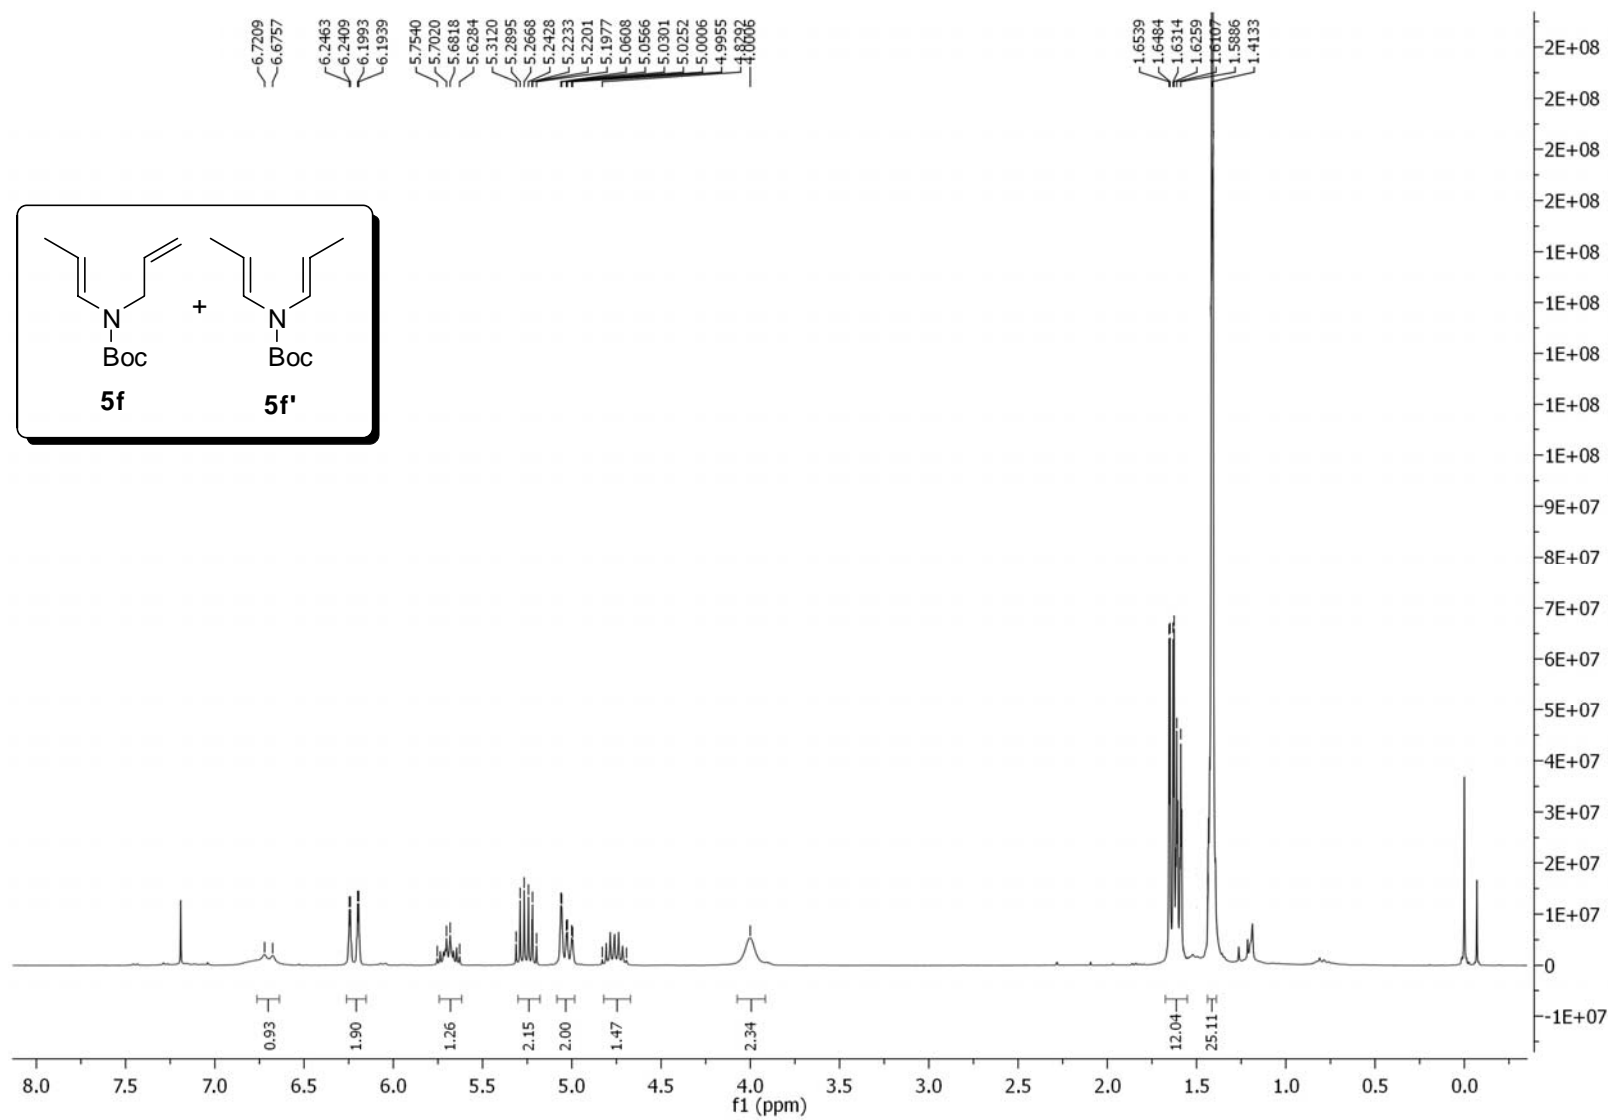

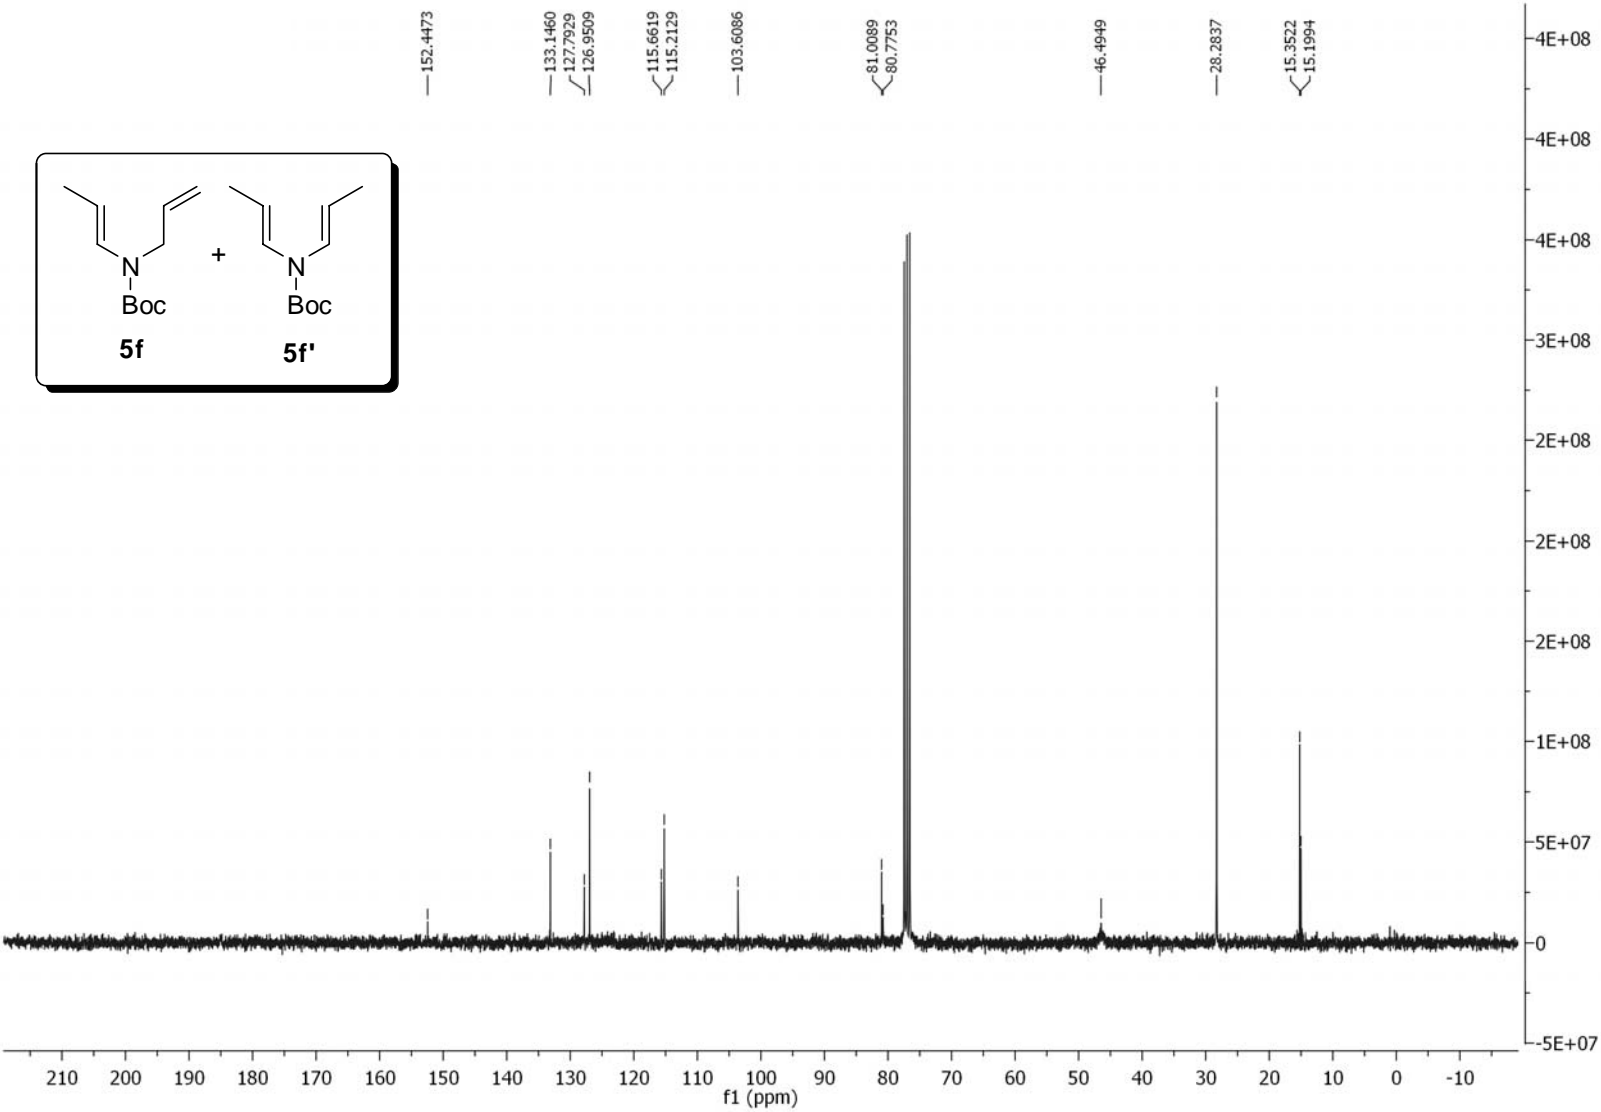

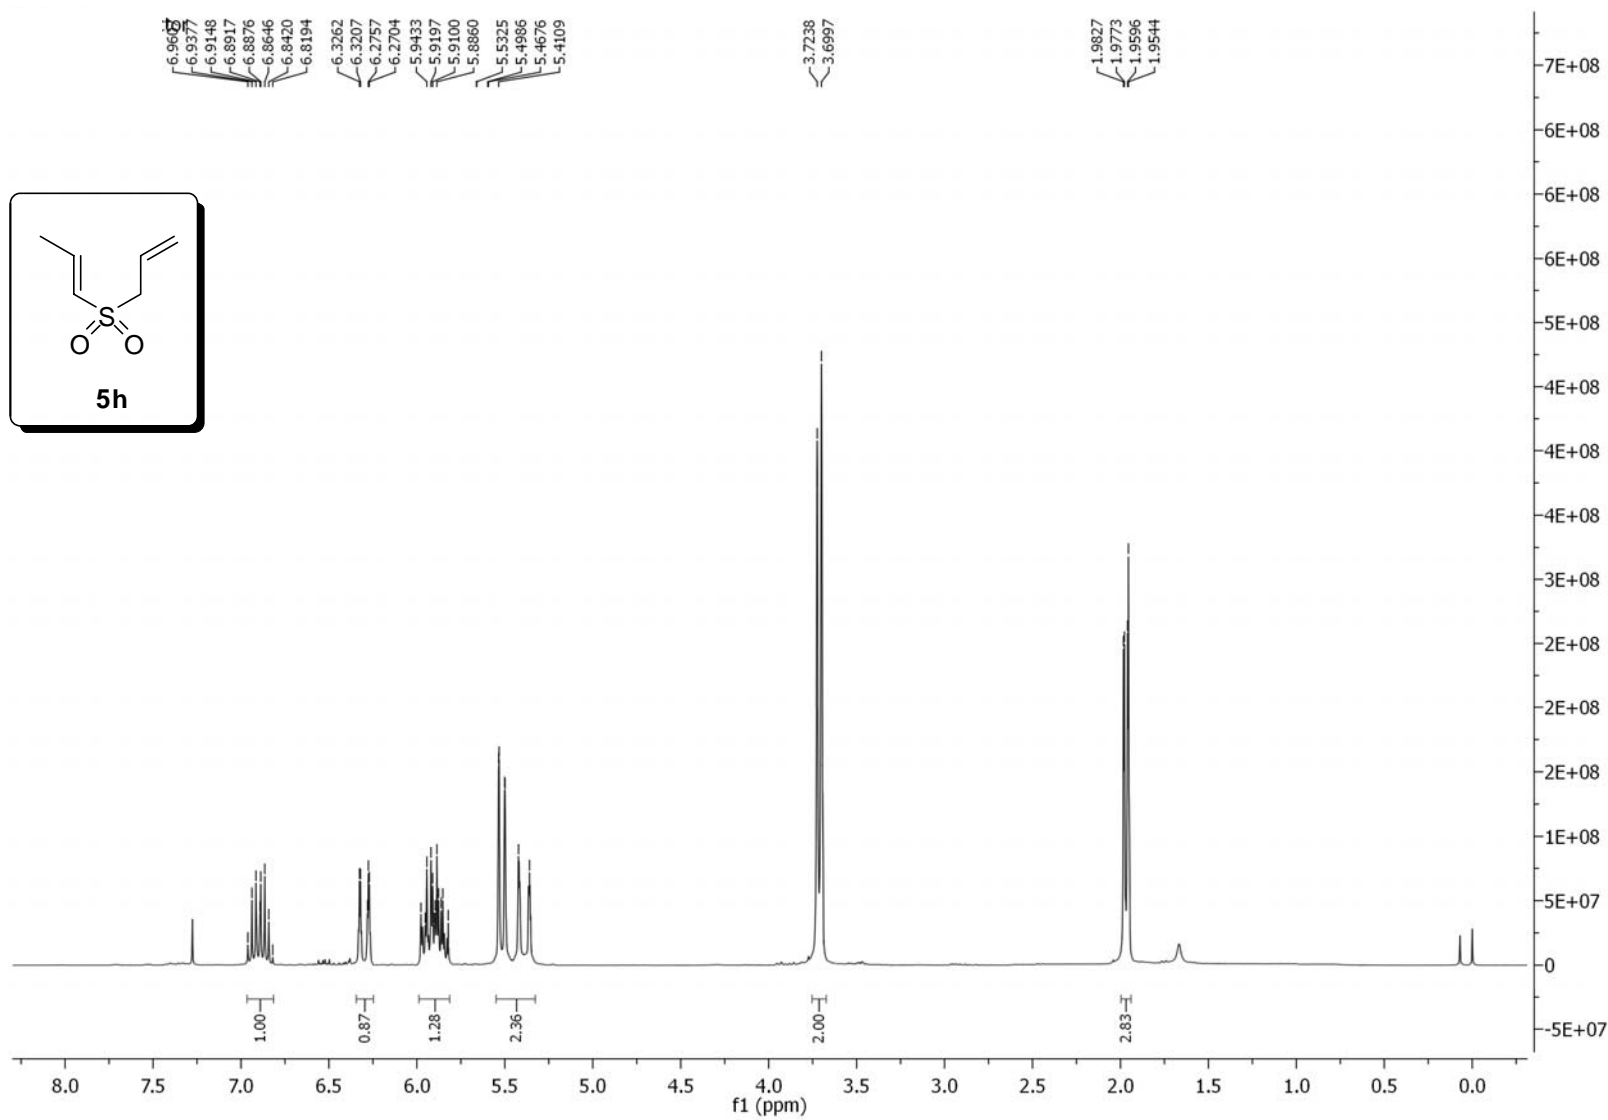

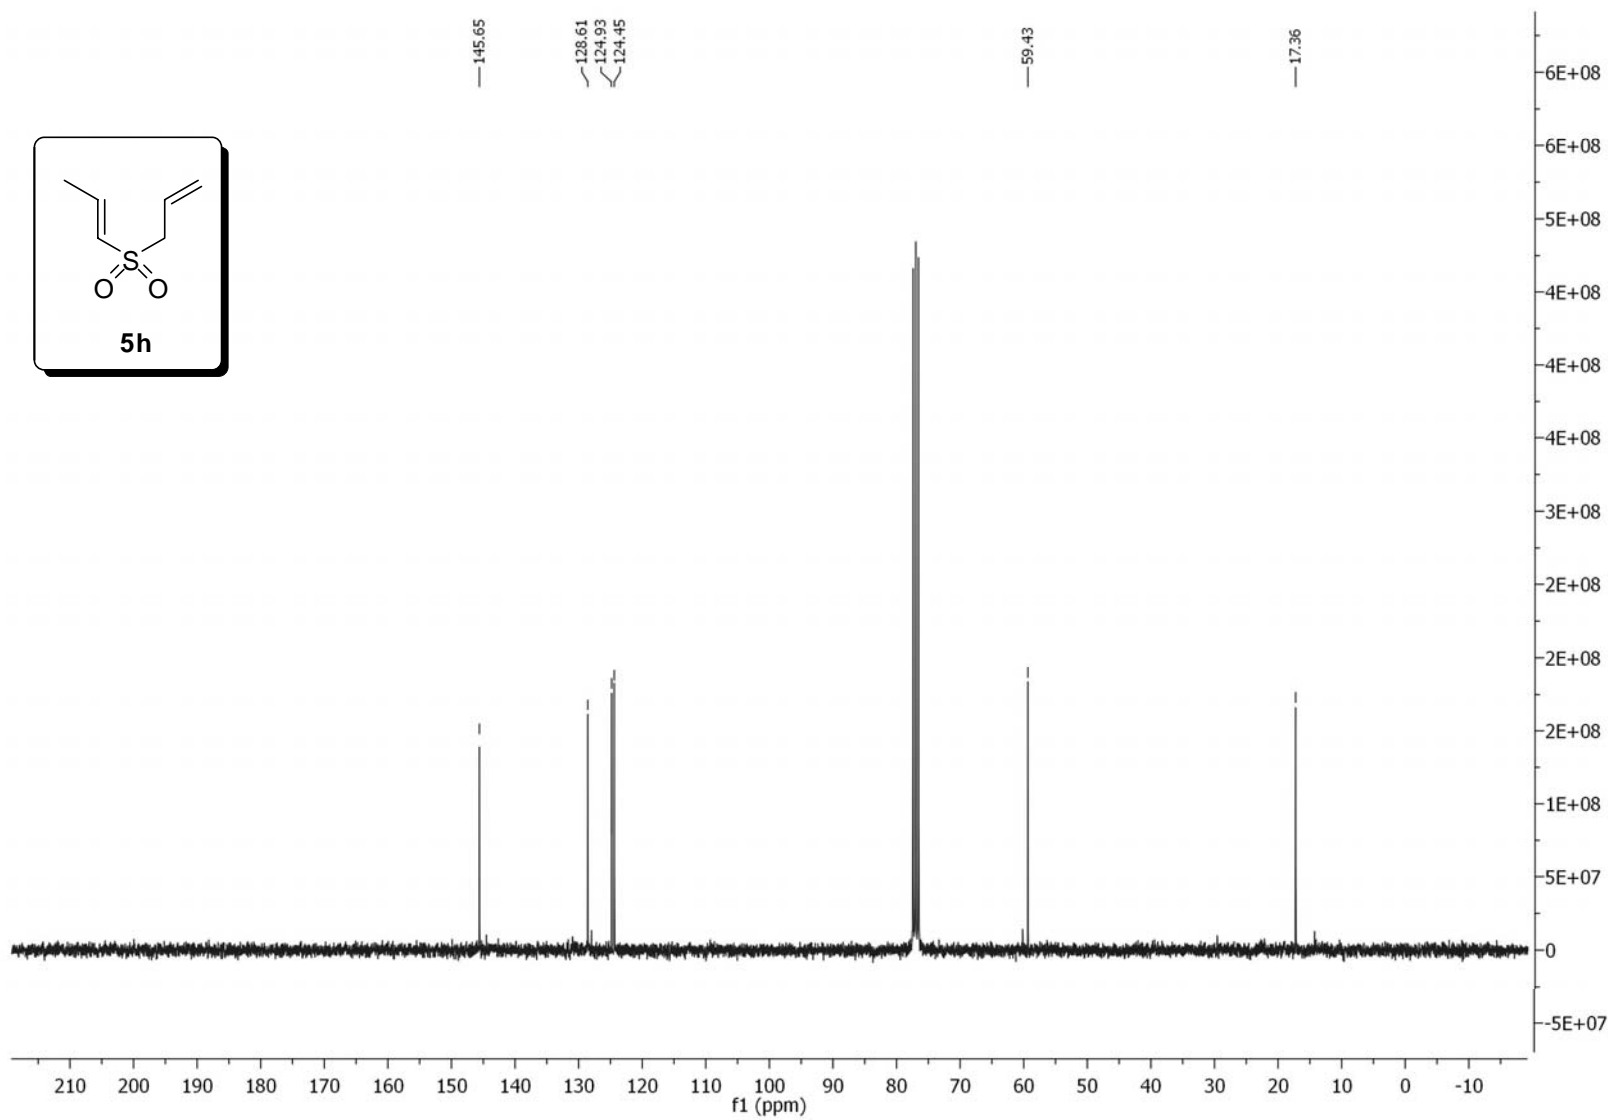

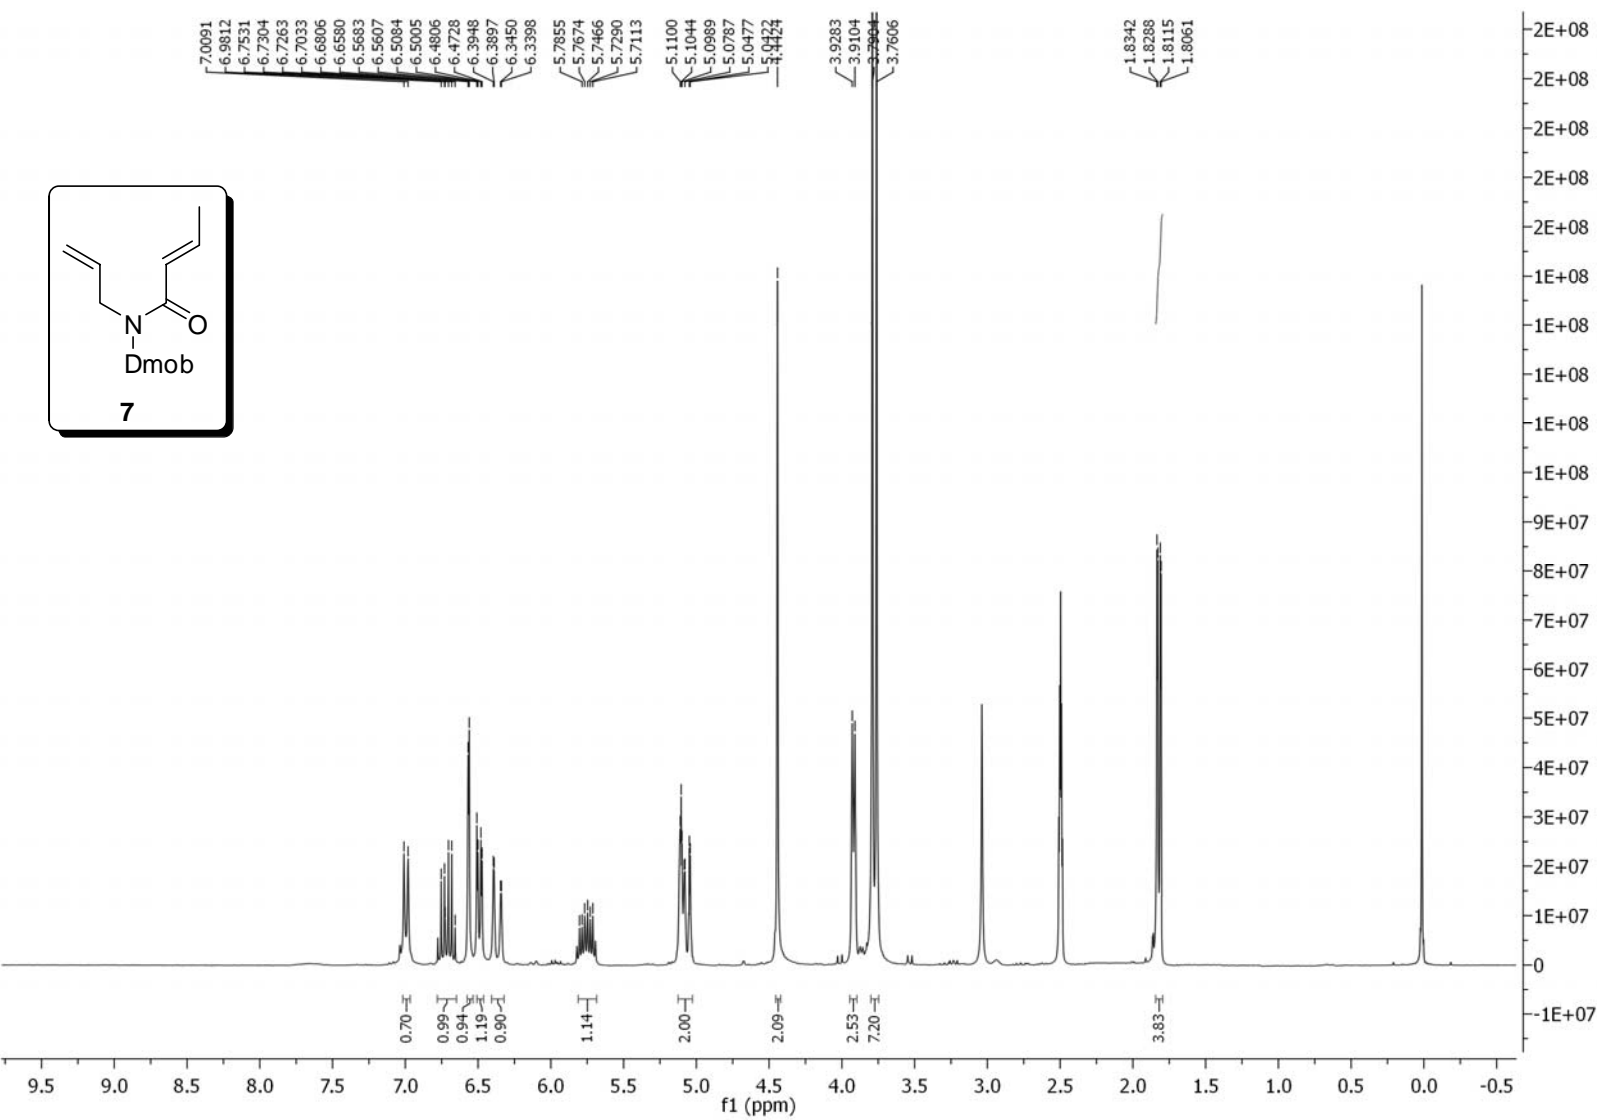

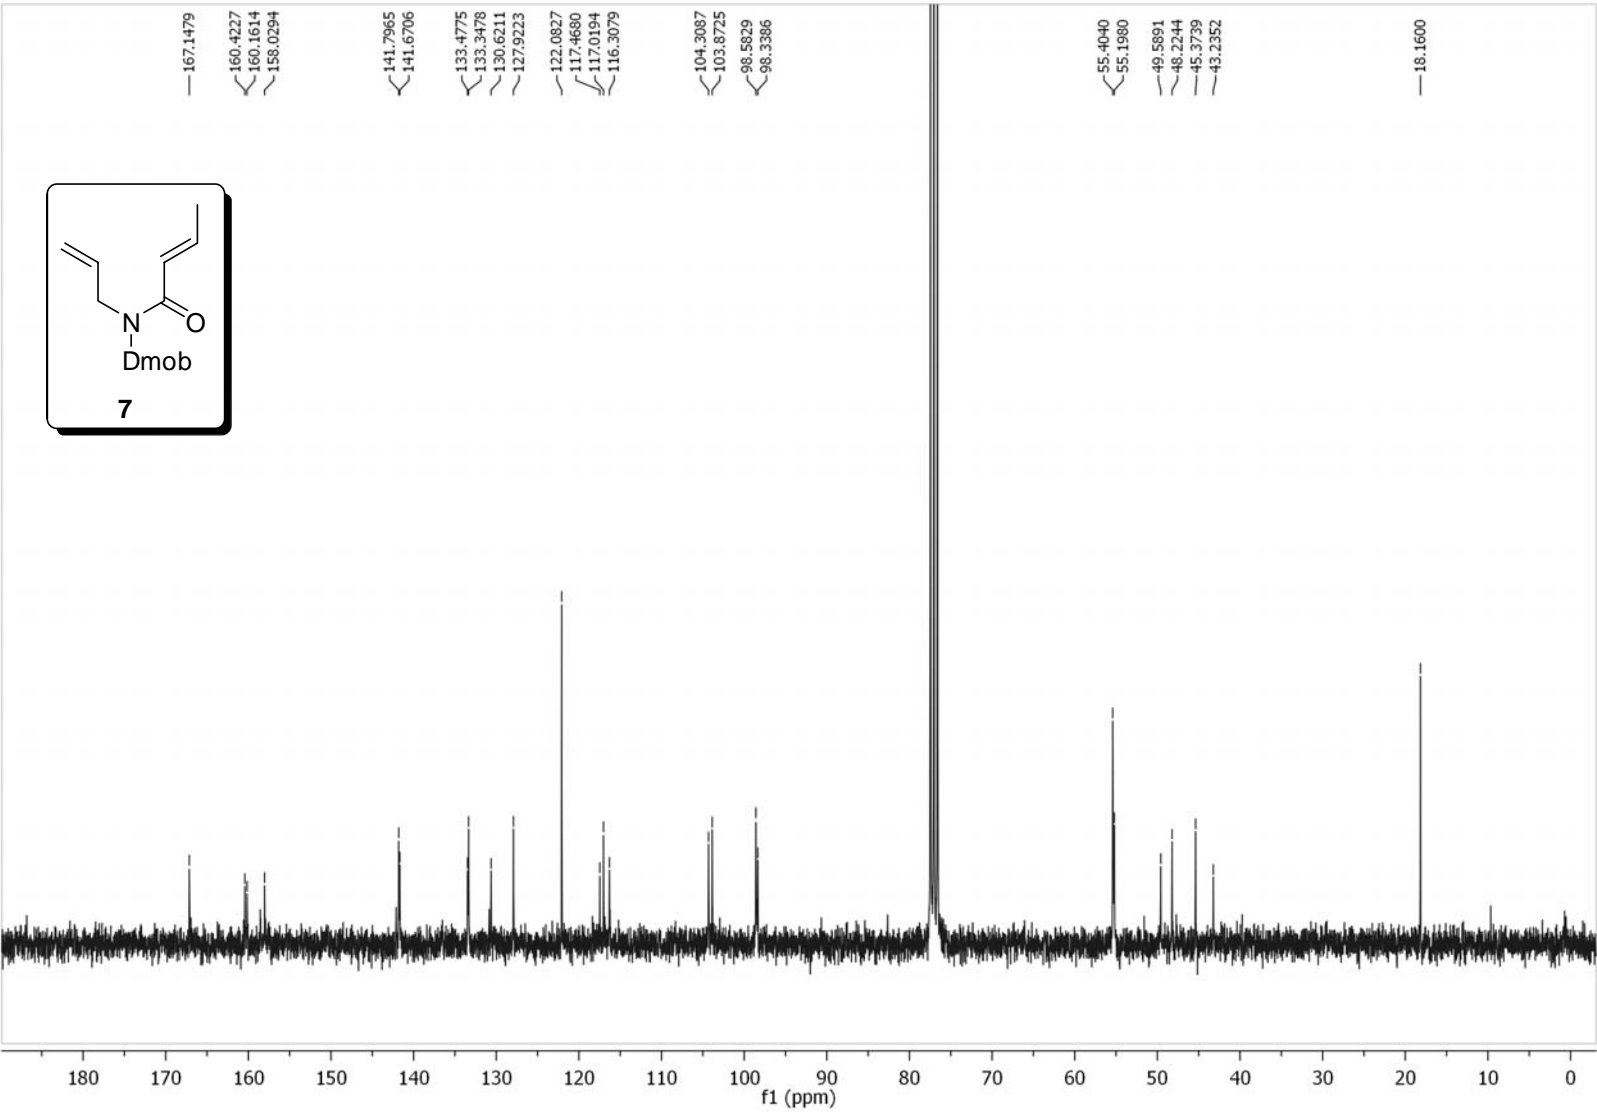



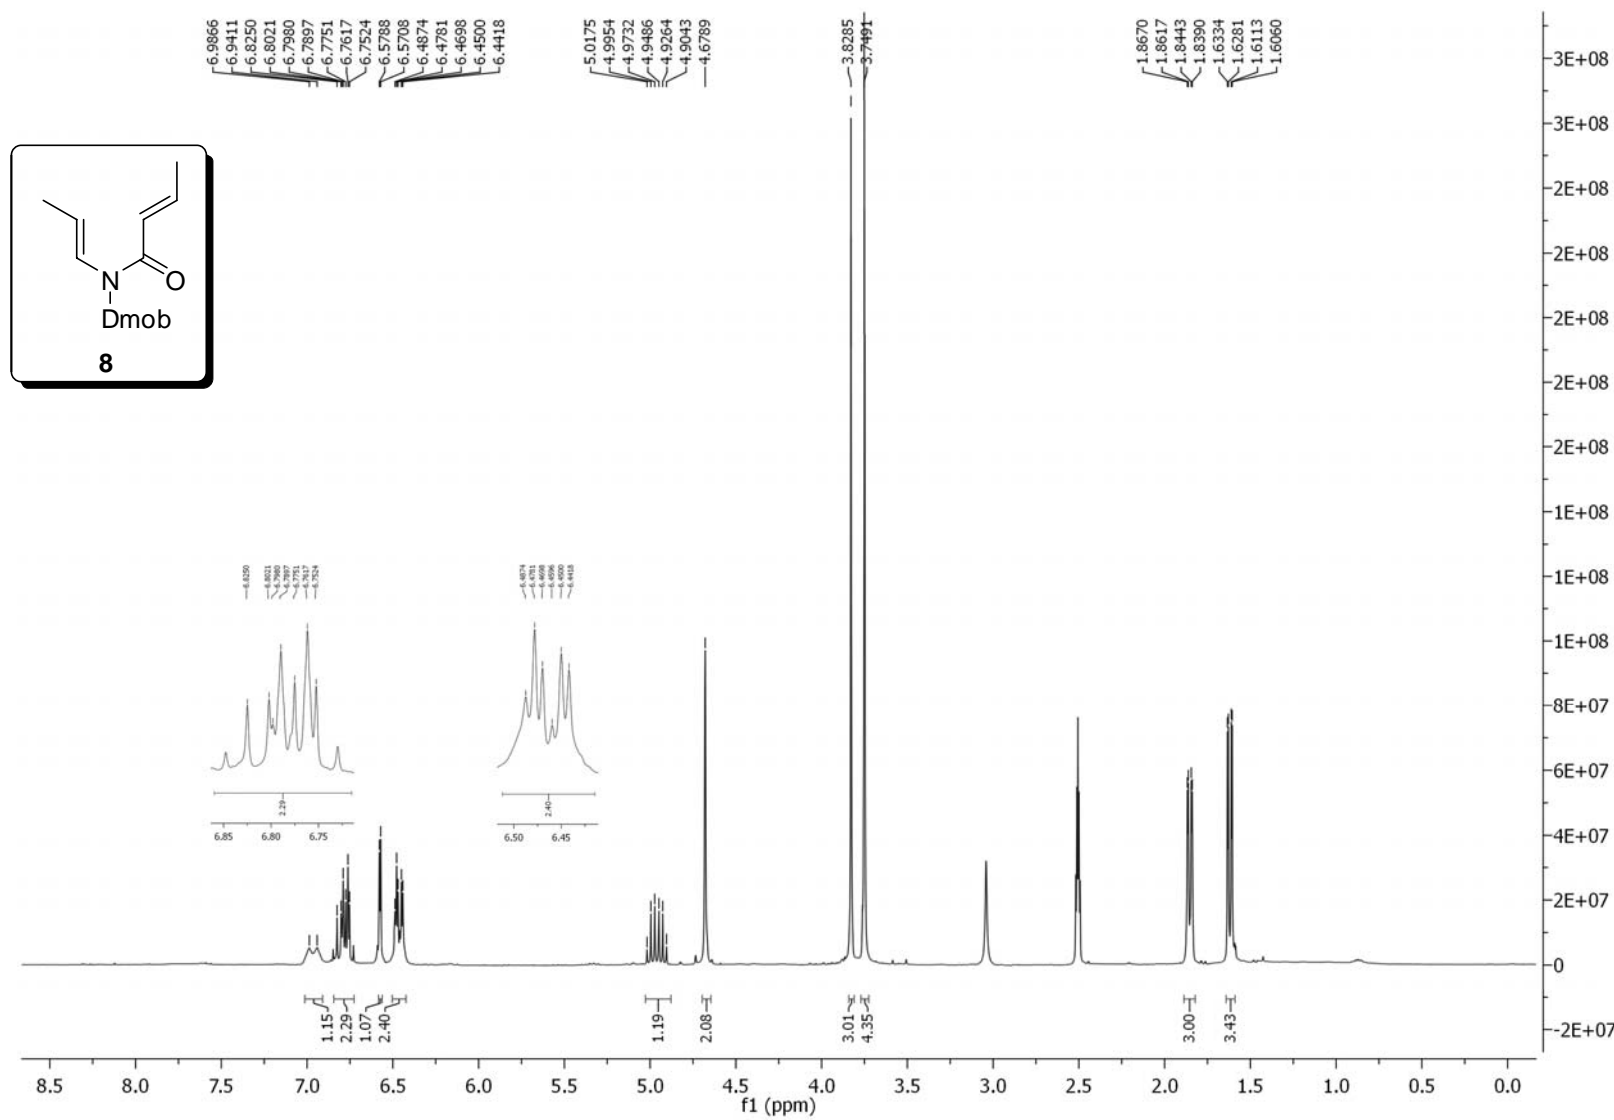

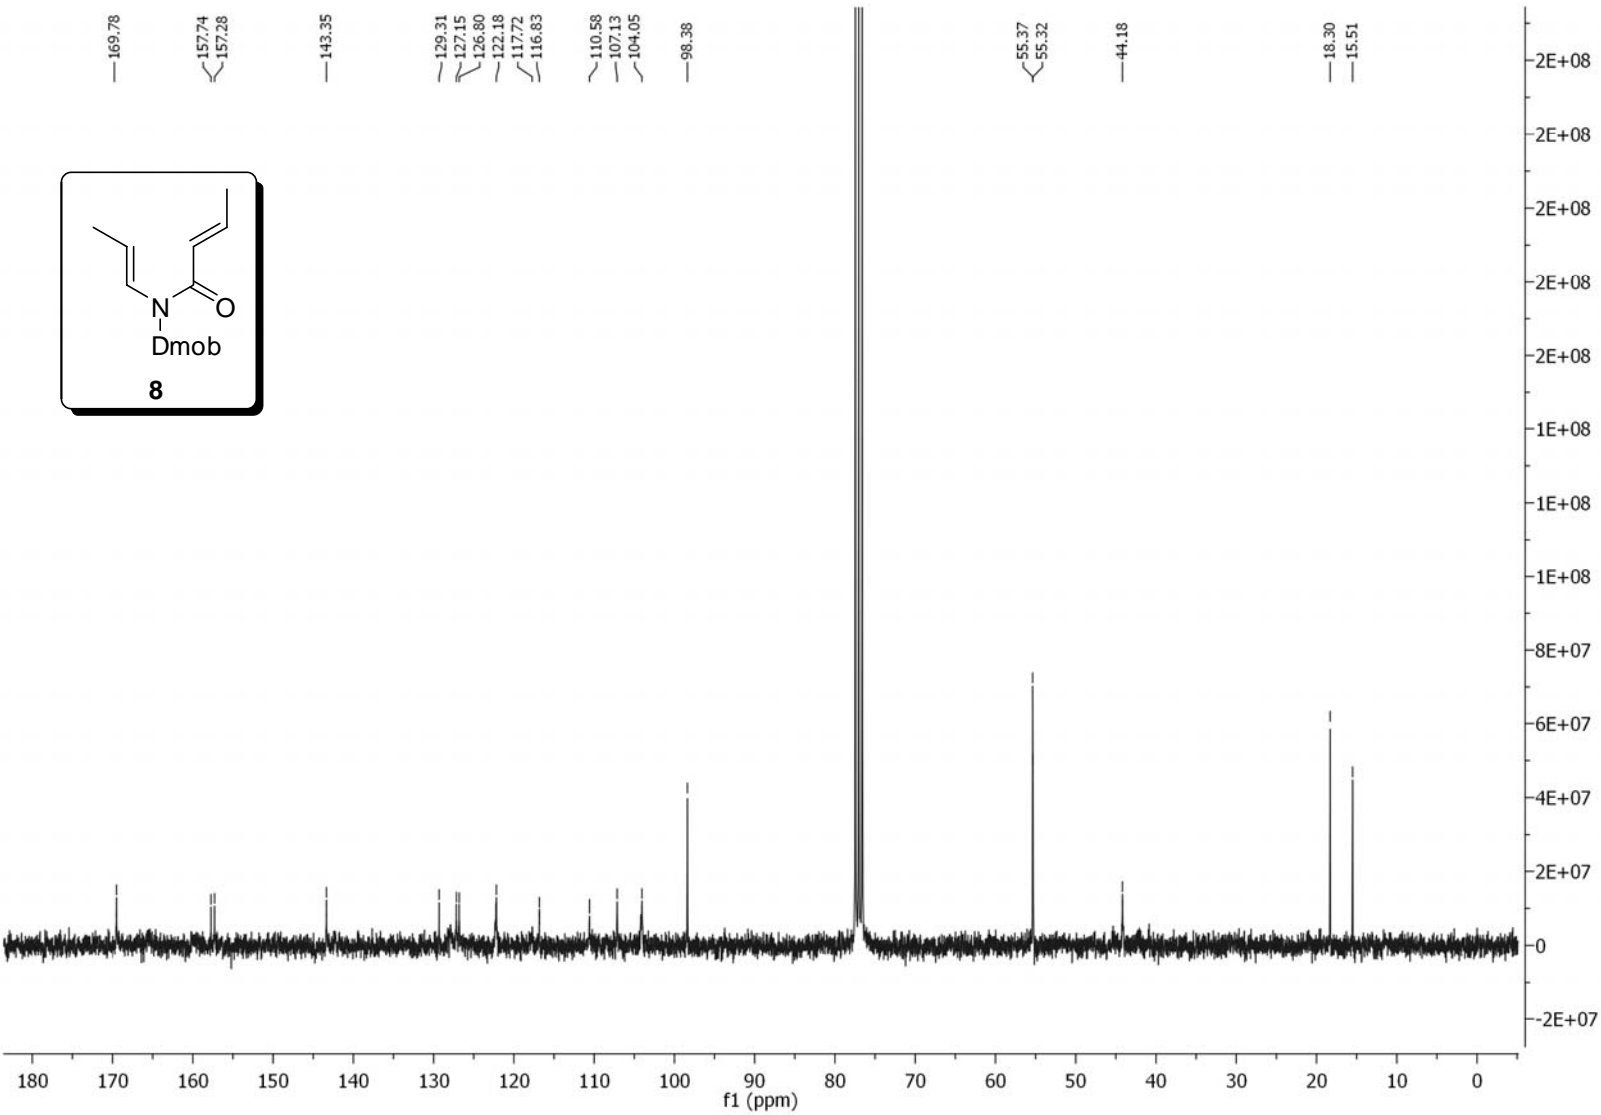

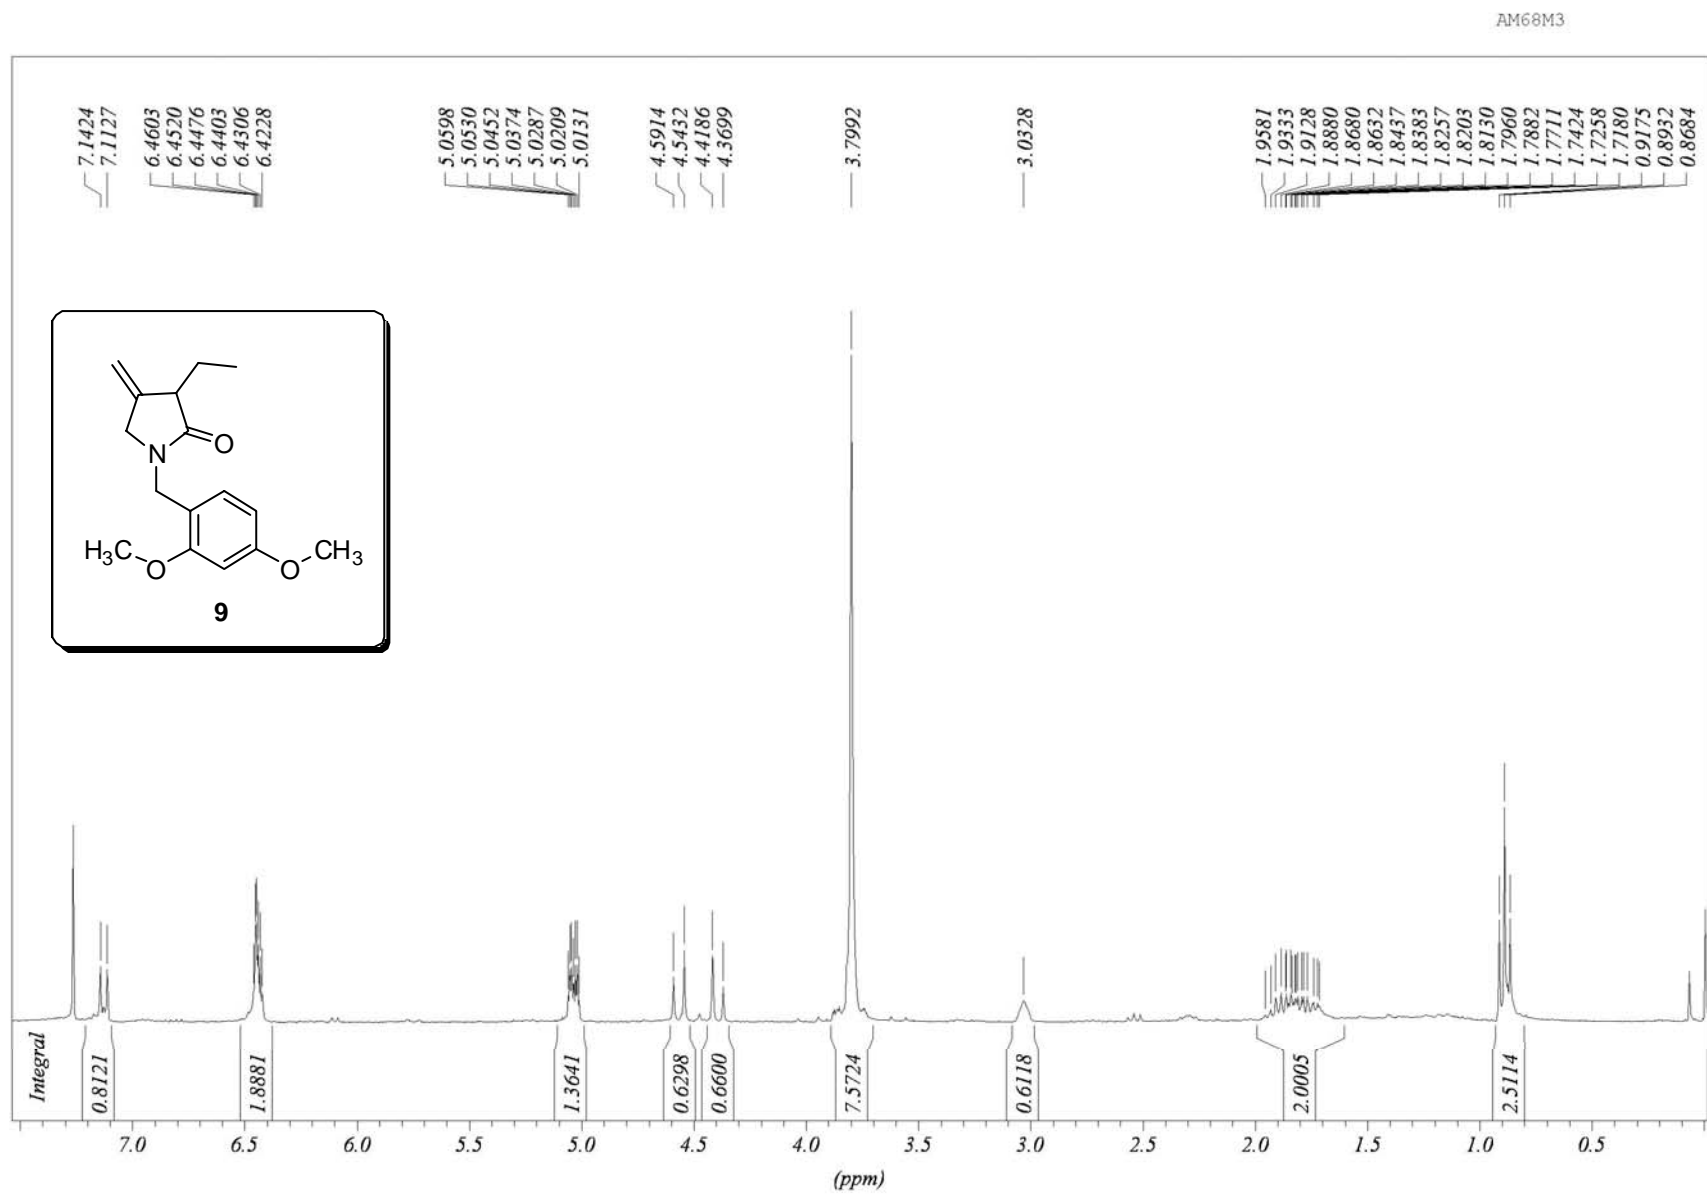

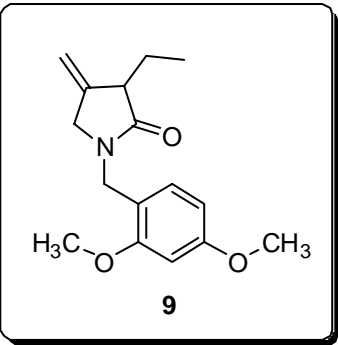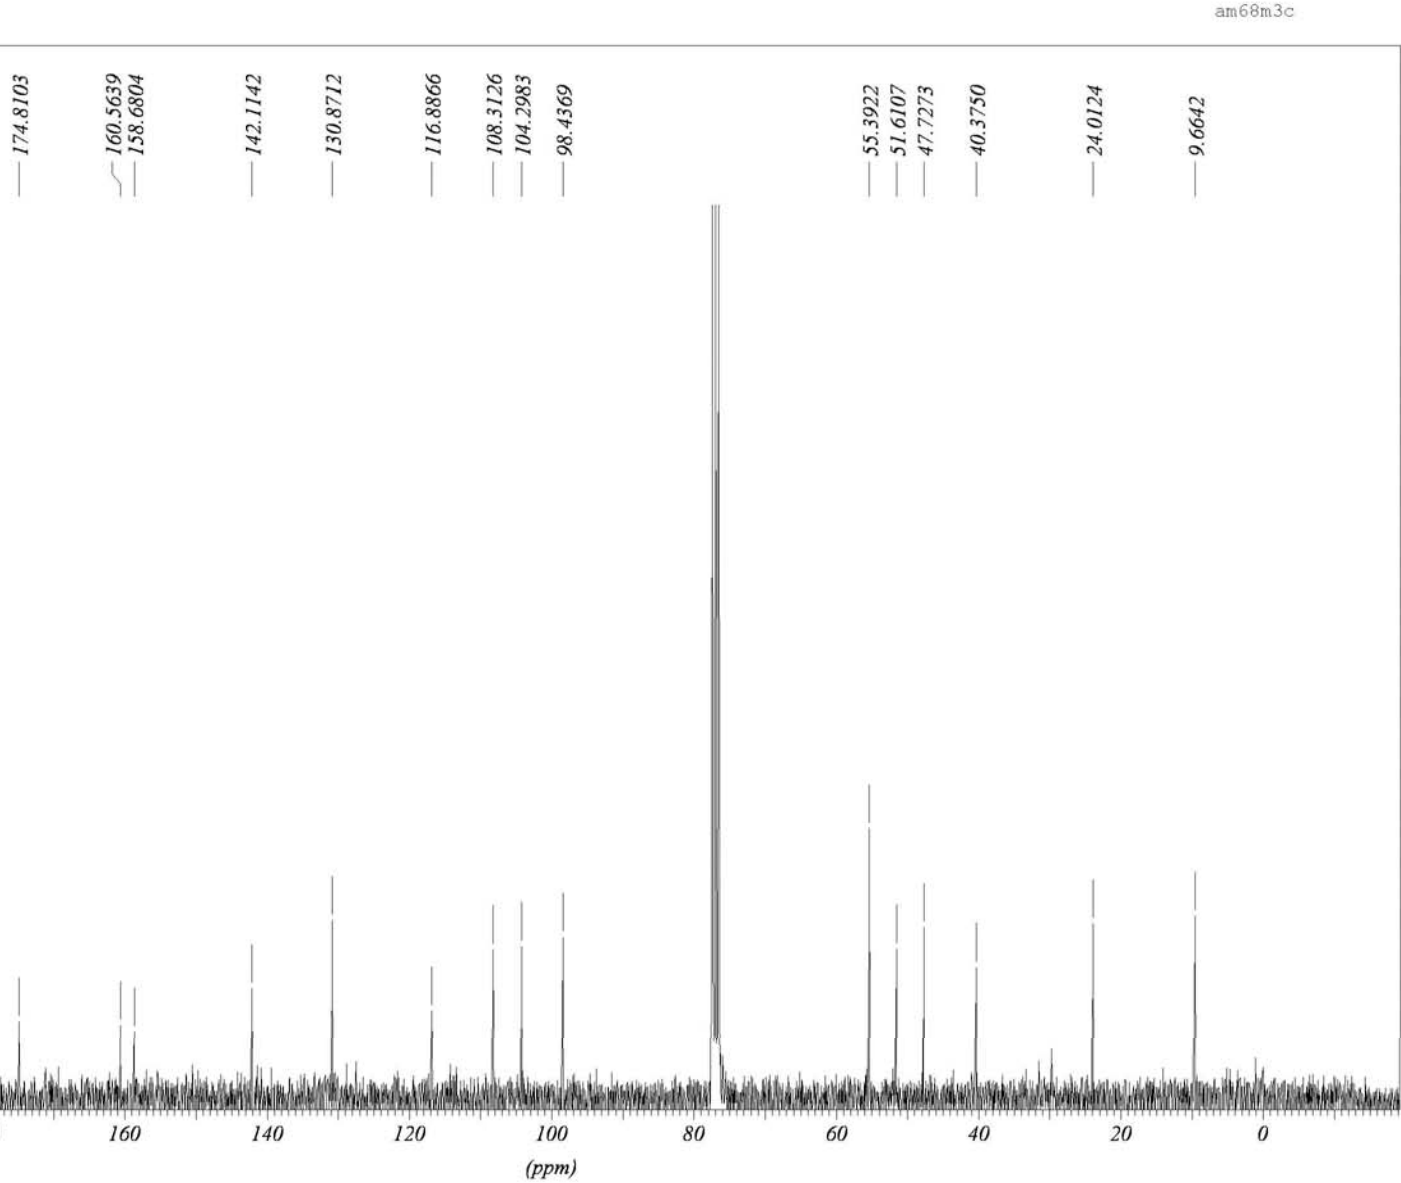

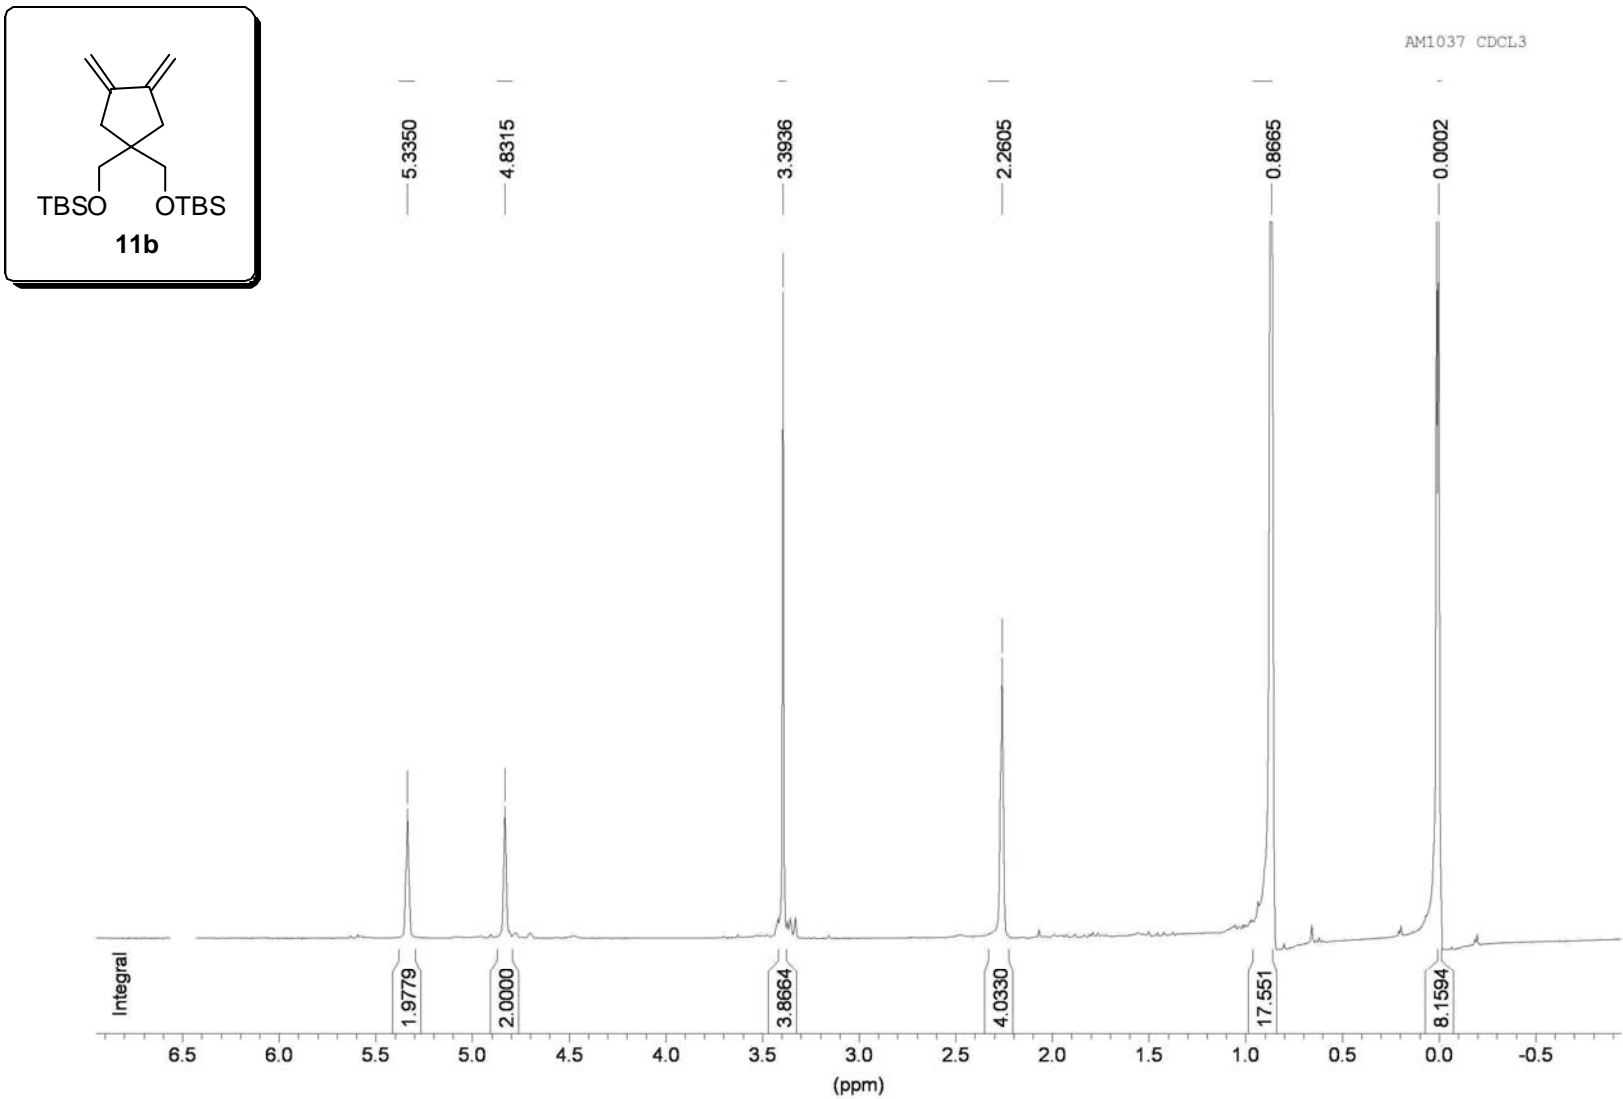

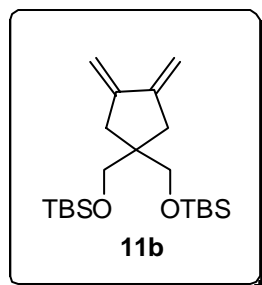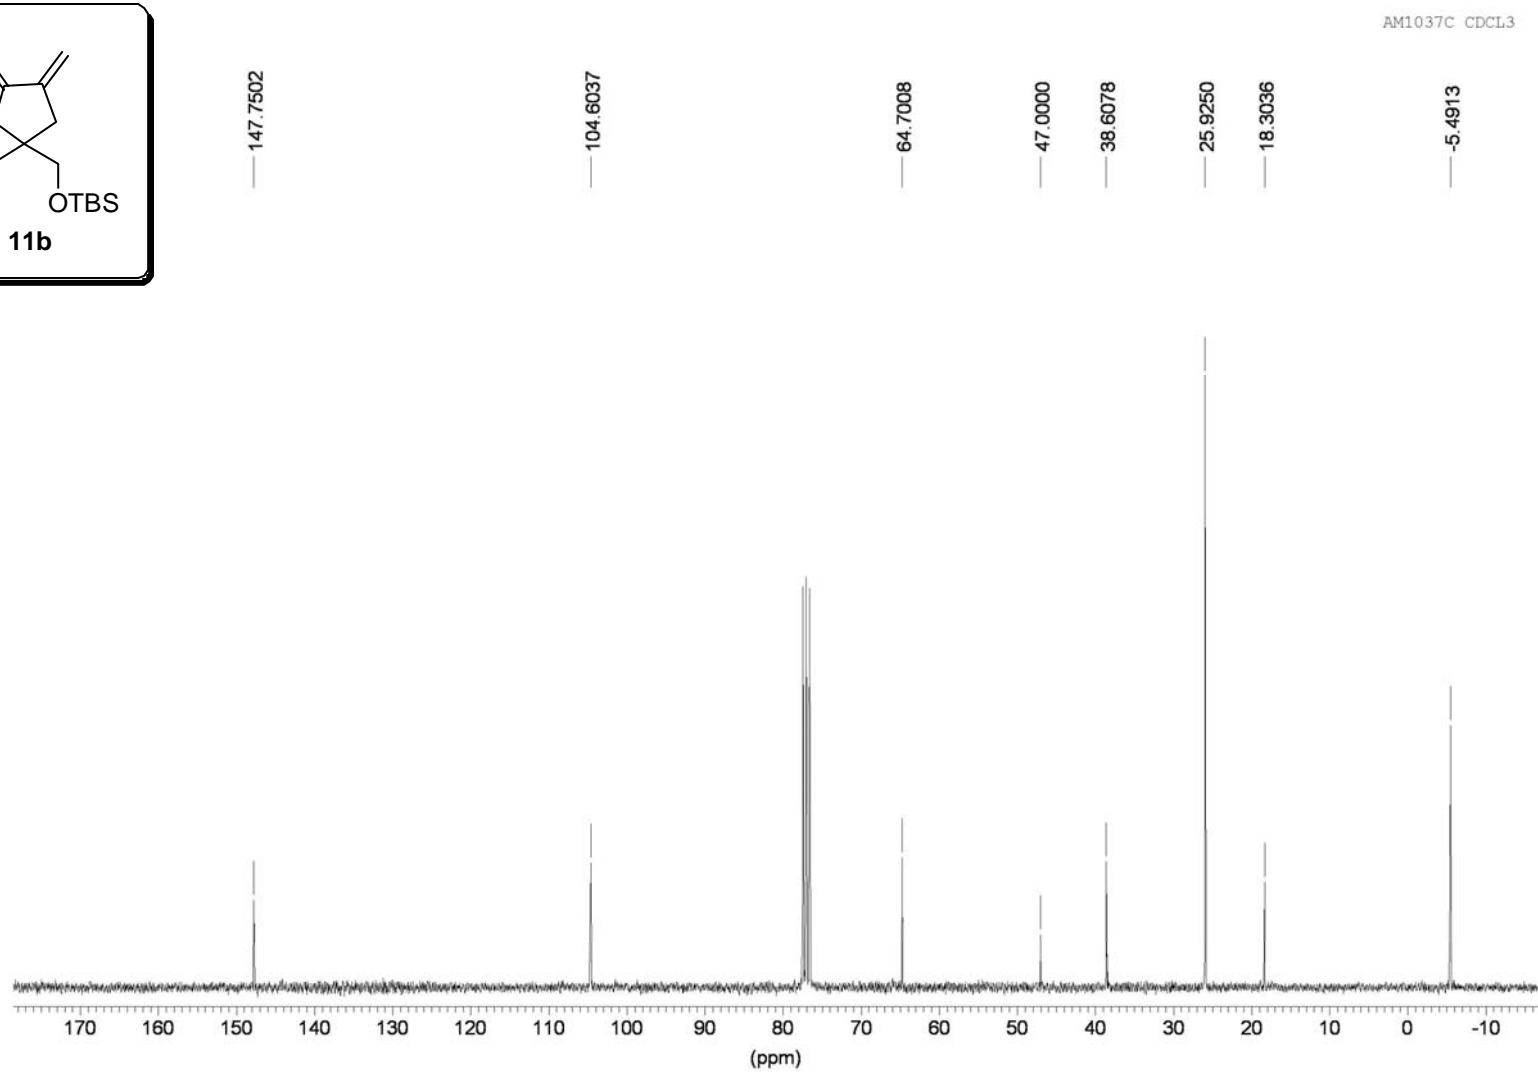

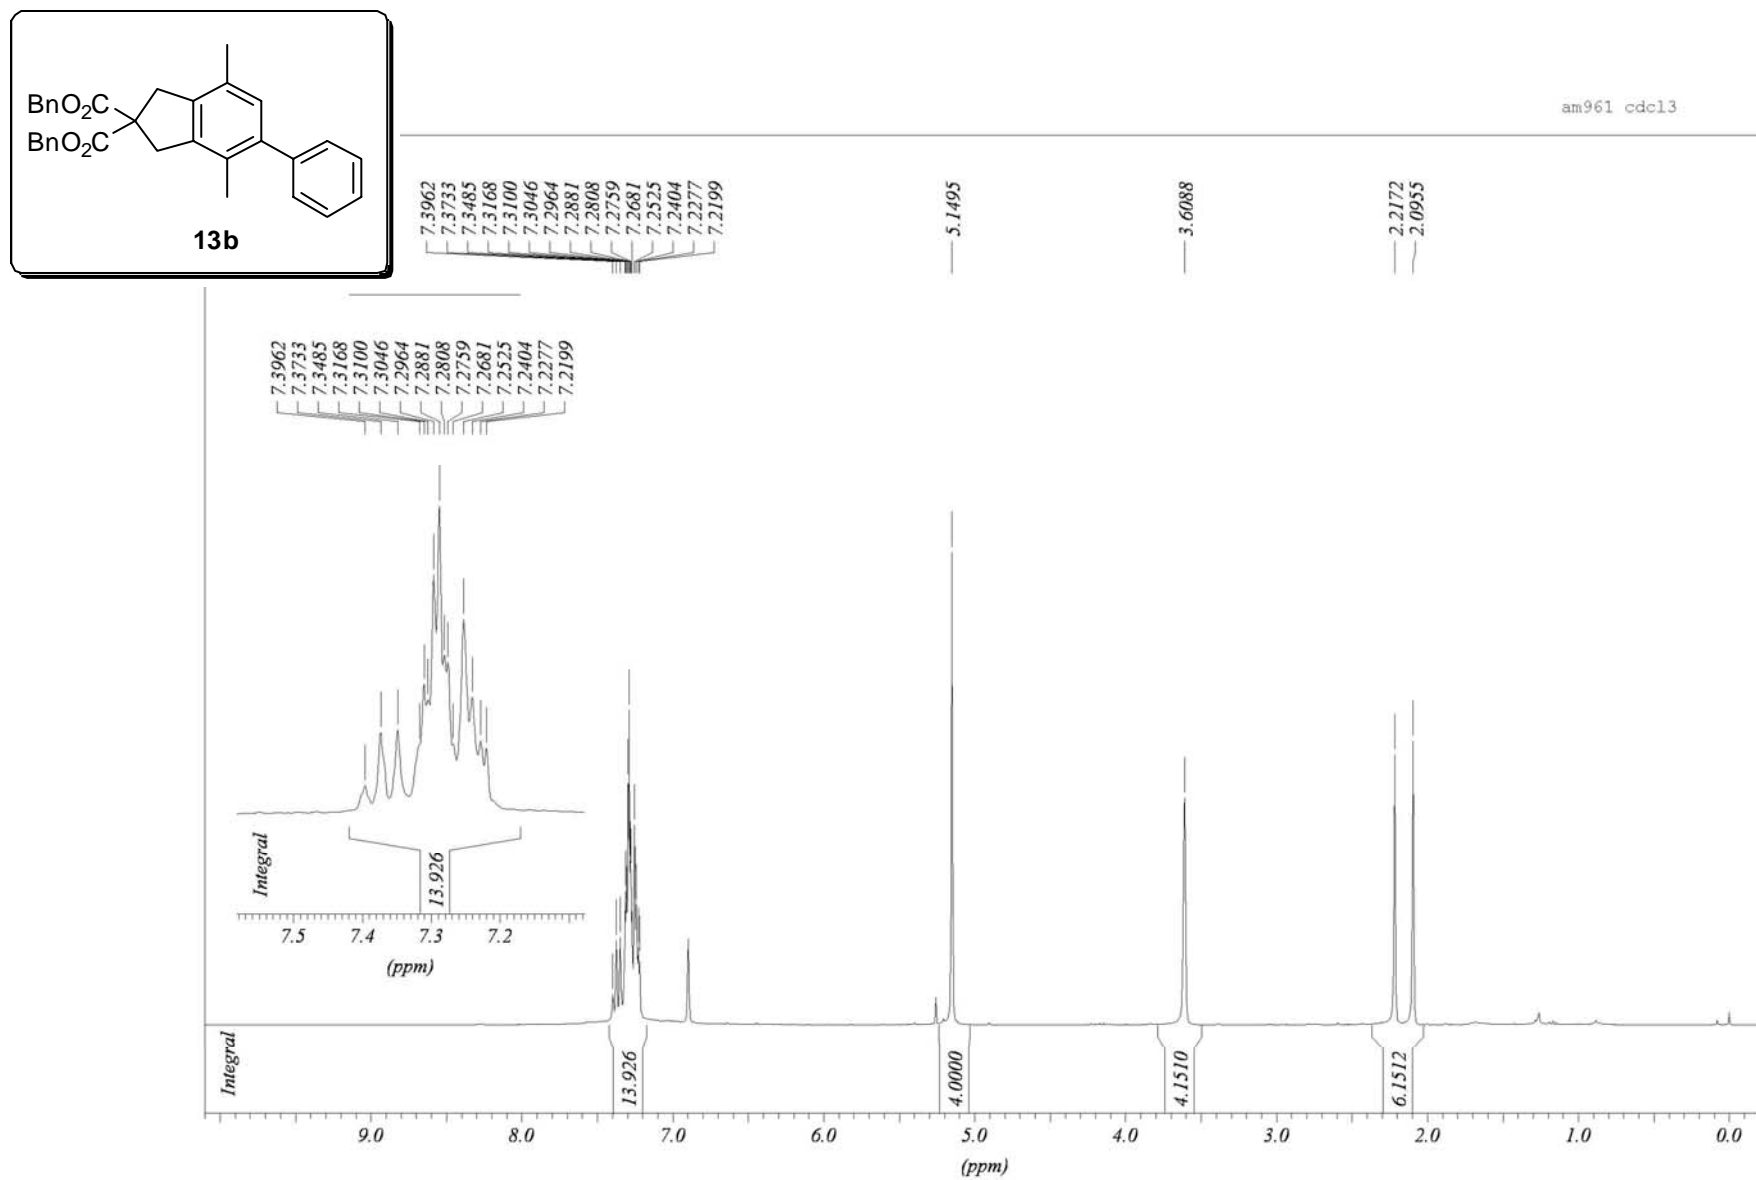

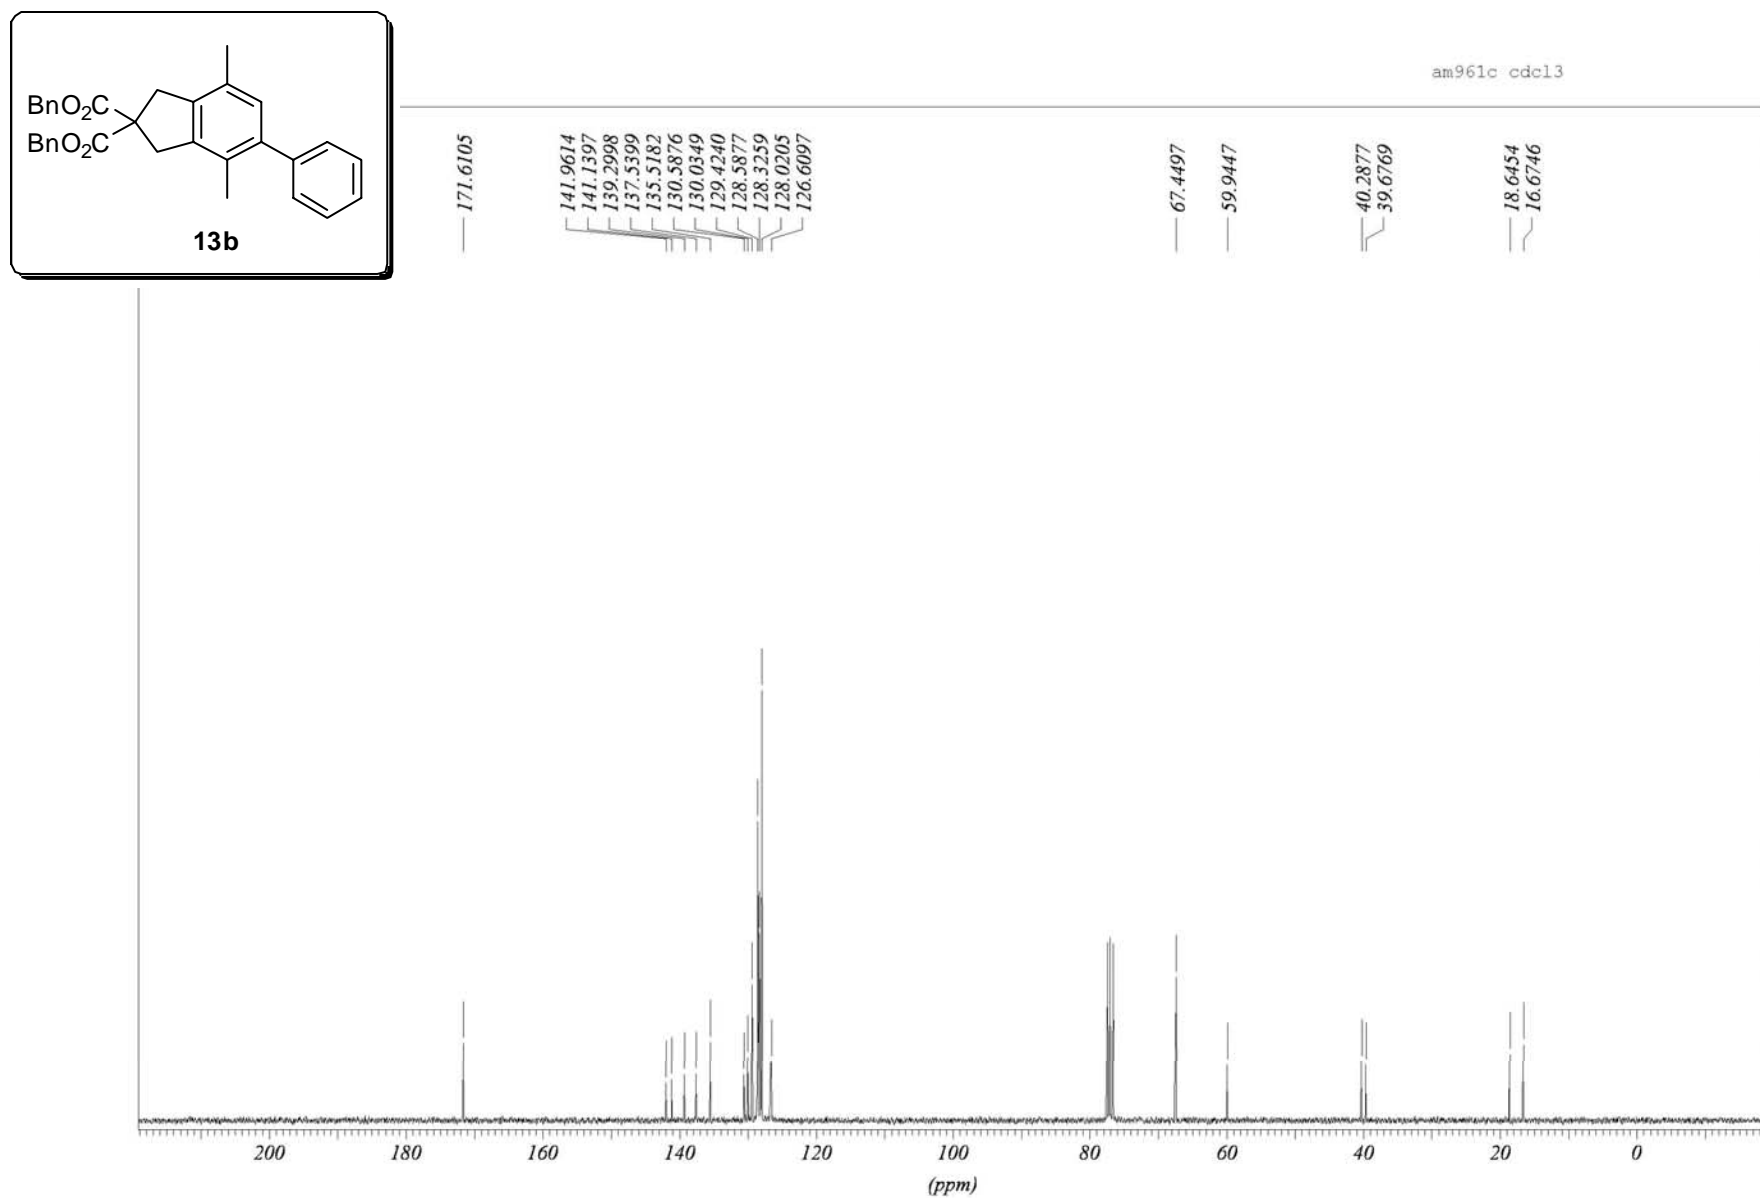



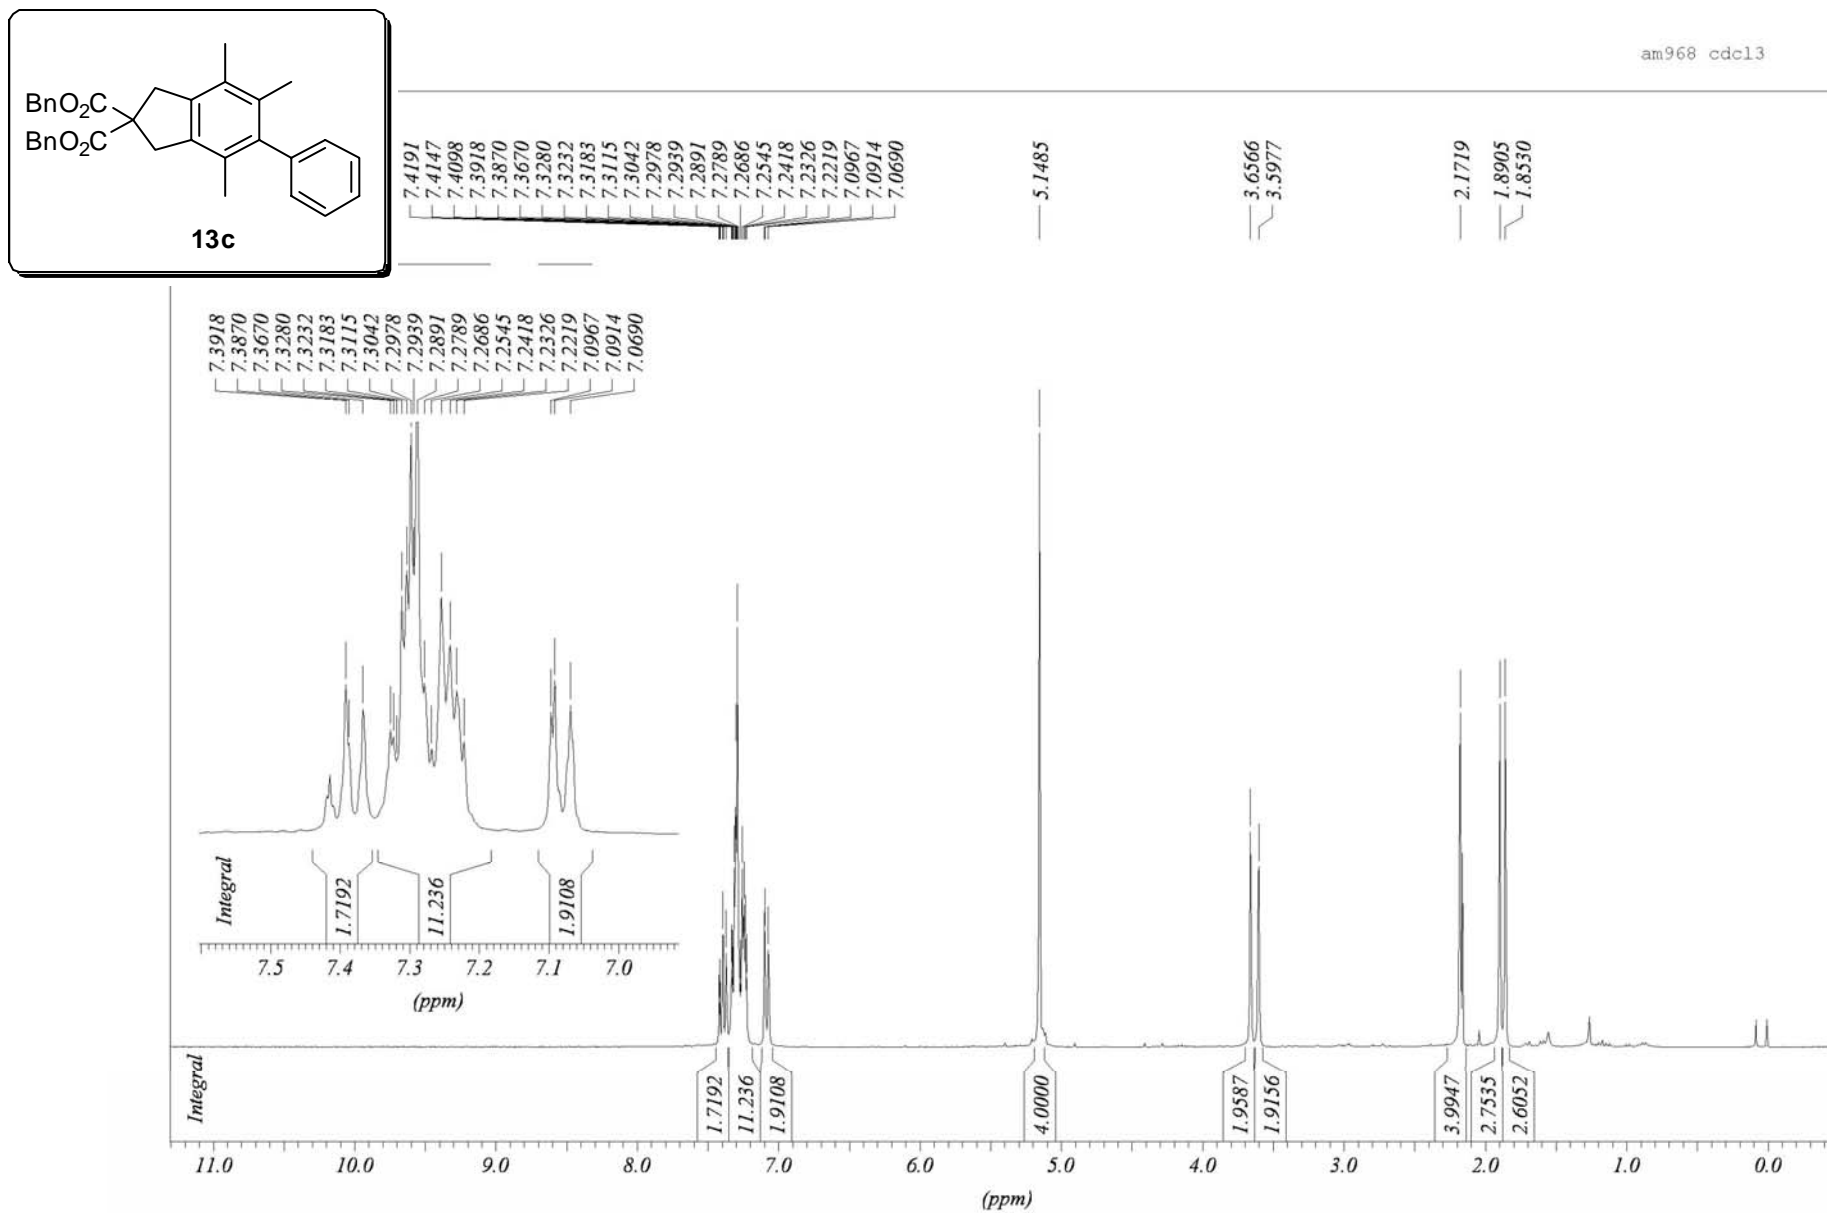

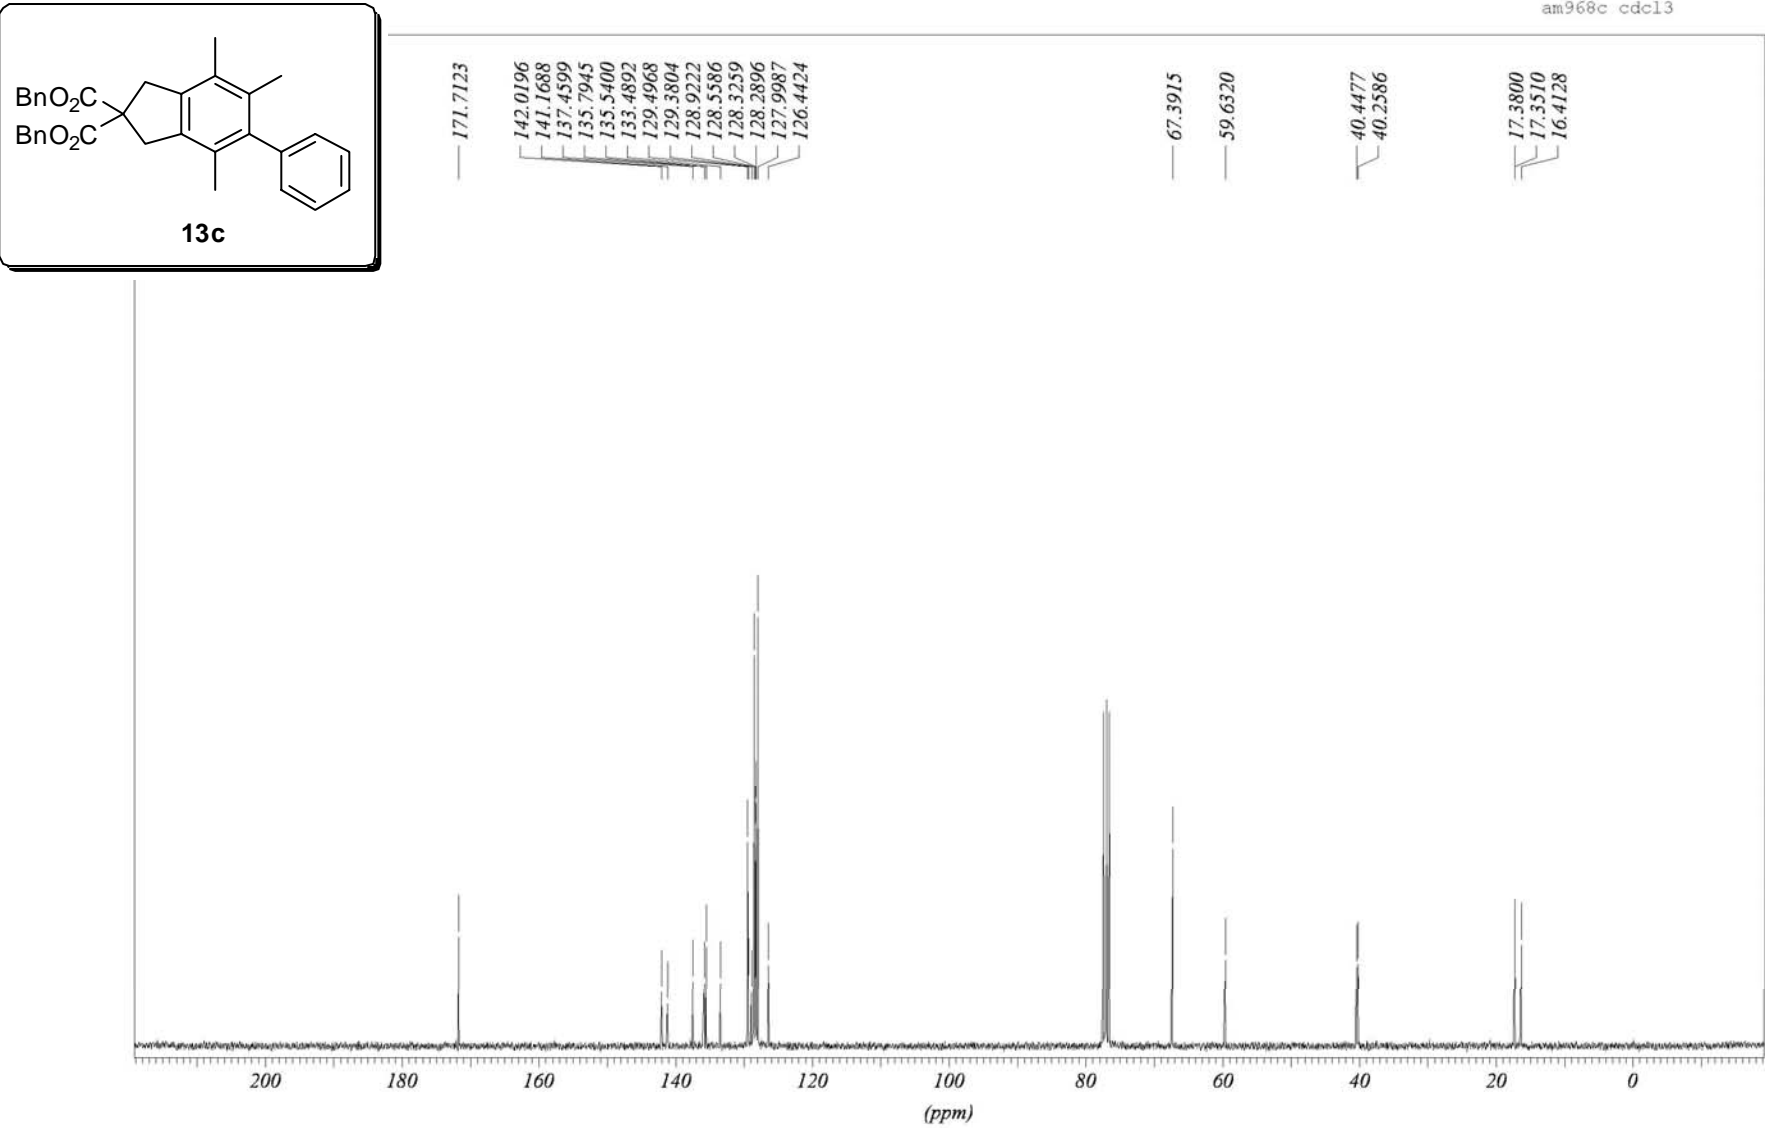

Supplement: c2ob07185a.pdf [file c2ob07185a.pdf]
