# Supplementary material for: Cycloisomerization of dienes and enynes catalysed by a modified ruthenium carbene species
Source: Royal Society of Chemistry journal article supplement (doi:10.1039/c2ob07185a), 2012-01-01

## **Cycloisomerization of dienes and enynes catalysed by a modified ruthenium carbene species**

*Álvaro Mallagaray, Kazem Mohammadiannejad-Abbasabadi, Sandra Medina, Gema Domínguez, and Javier Pérez-Castells\**

Facultad de Farmacia, Dpto. Química, Universidad San Pablo CEU,  
Urb. Montepríncipe, ctra. Boadilla km 5,300  
Boadilla del Monte, 28668 Madrid, Spain

## **Supplementary material 2**

**<sup>1</sup>H Kinetics experiment with [Ru]-II (DMF-d<sub>7</sub>) (400 MHz):**

Catalyst [Ru]-II (20 mg, 0.023 mmol) was loaded in an NMR tube and anhydrous DMF-d<sub>7</sub> (99.5 atom % D) (0.7 mL) and one drop of anhydrous DMF was added. The tube was filled with argon, closed and the temperature was progressively increased (30 °C/minute) and <sup>1</sup>H was acquired every min. After 15 min the NMR tube was removed and quickly ice-cooled in order to stop the reaction. The last <sup>1</sup>H spectra was the acquired at 25 °C.

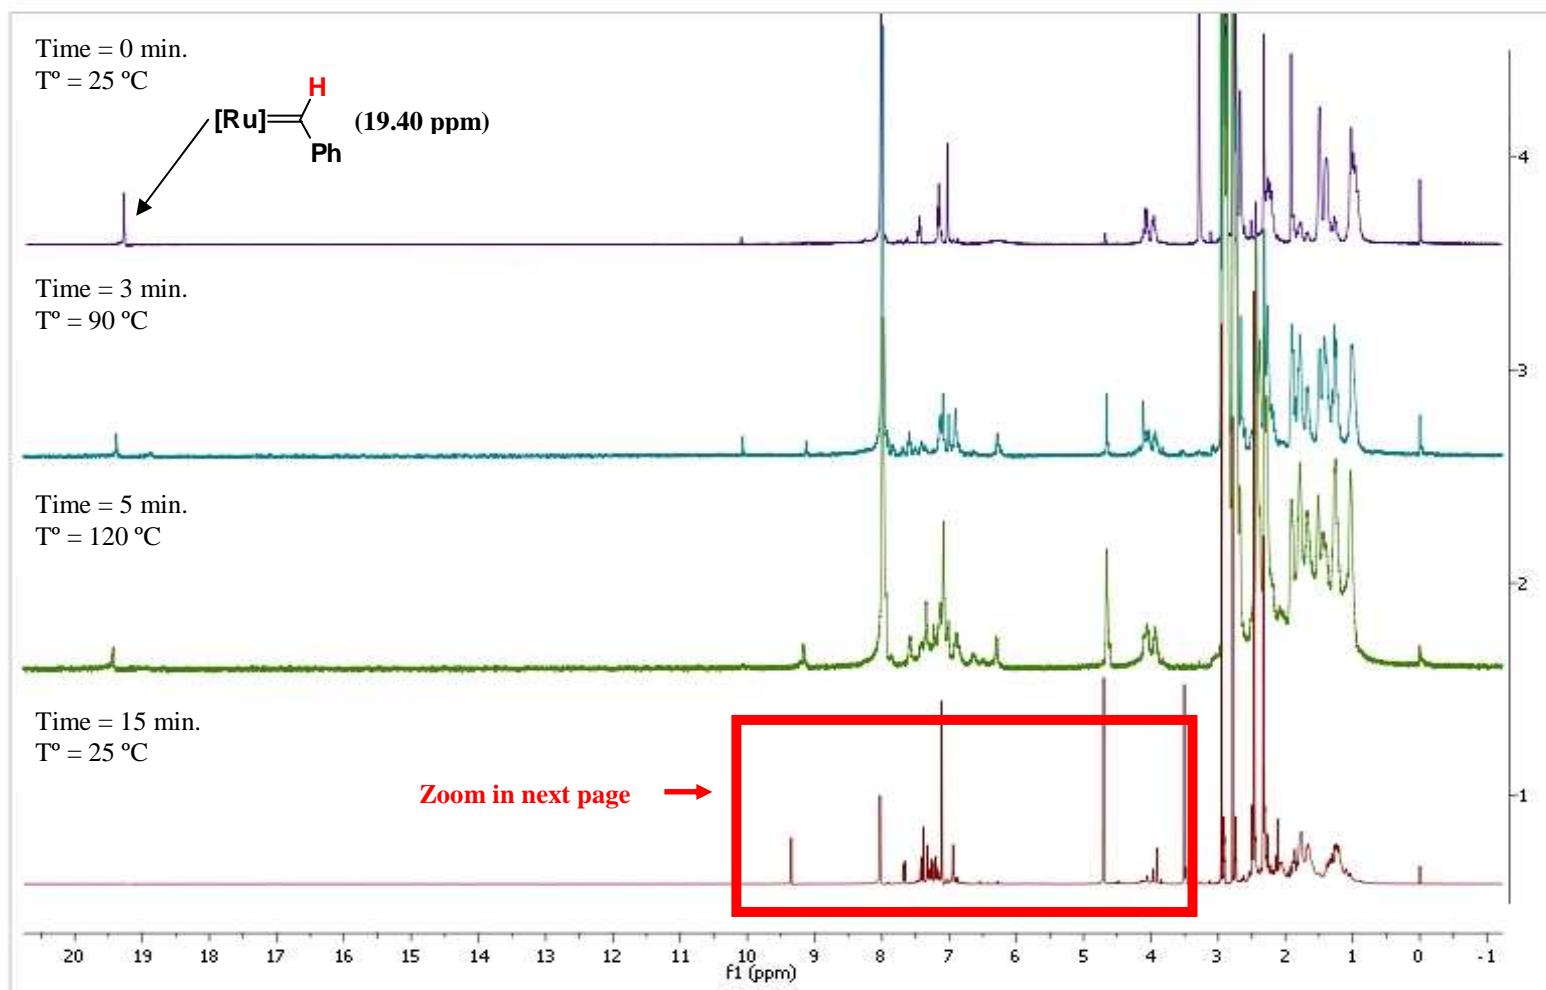

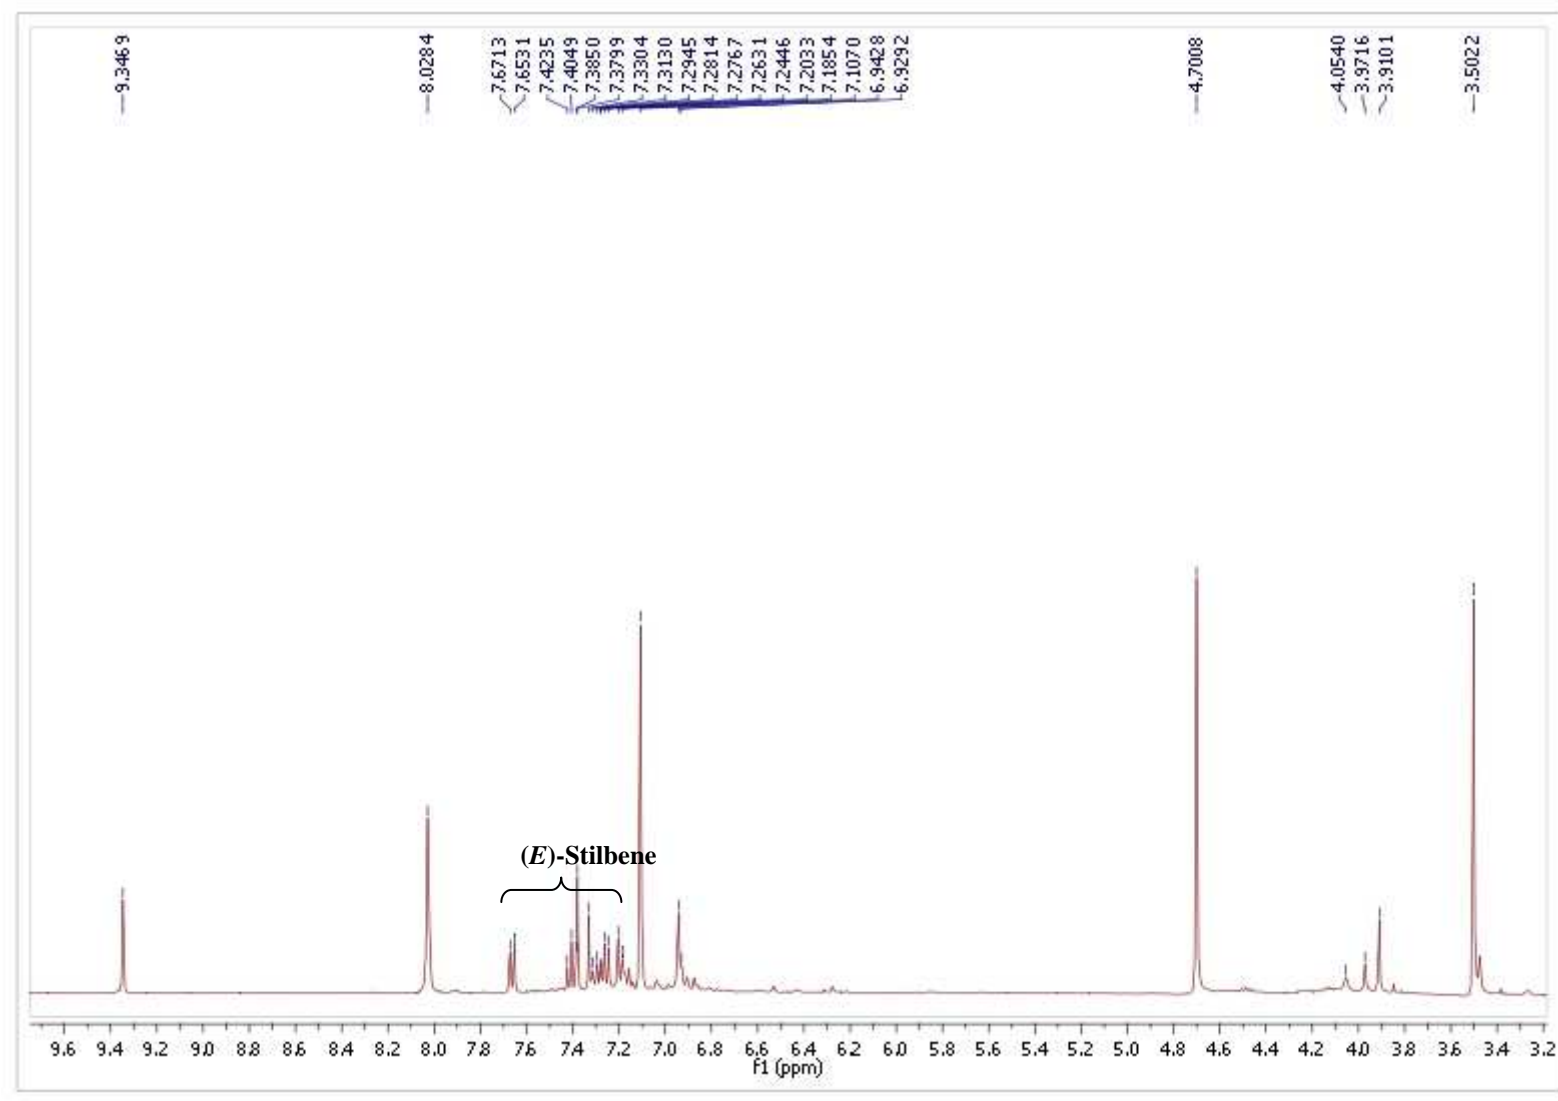

**$^{13}\text{C}$  spectrum of catalyst [Ru]-II modification reaction mixture after 15 min: (DMF- $d_7$ ) (400 MHz):**

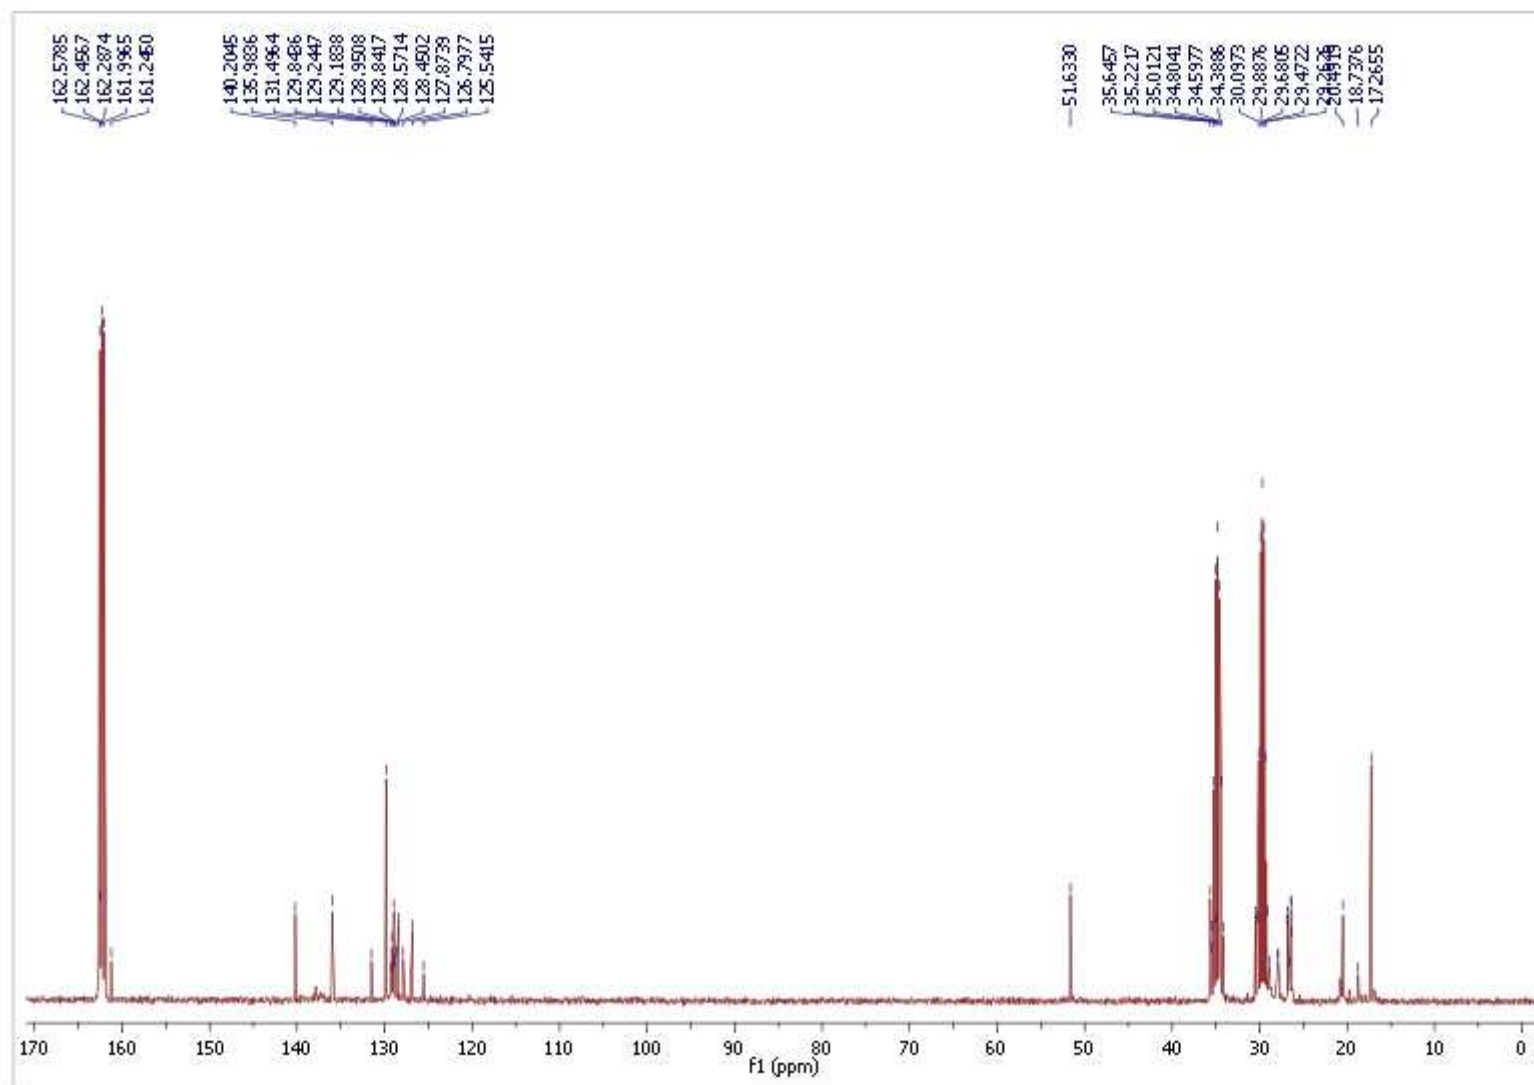

**$^{31}\text{P}$  Kinetics experiment with [Ru]-II (DMF- $d_7$ ) (300 MHz):**

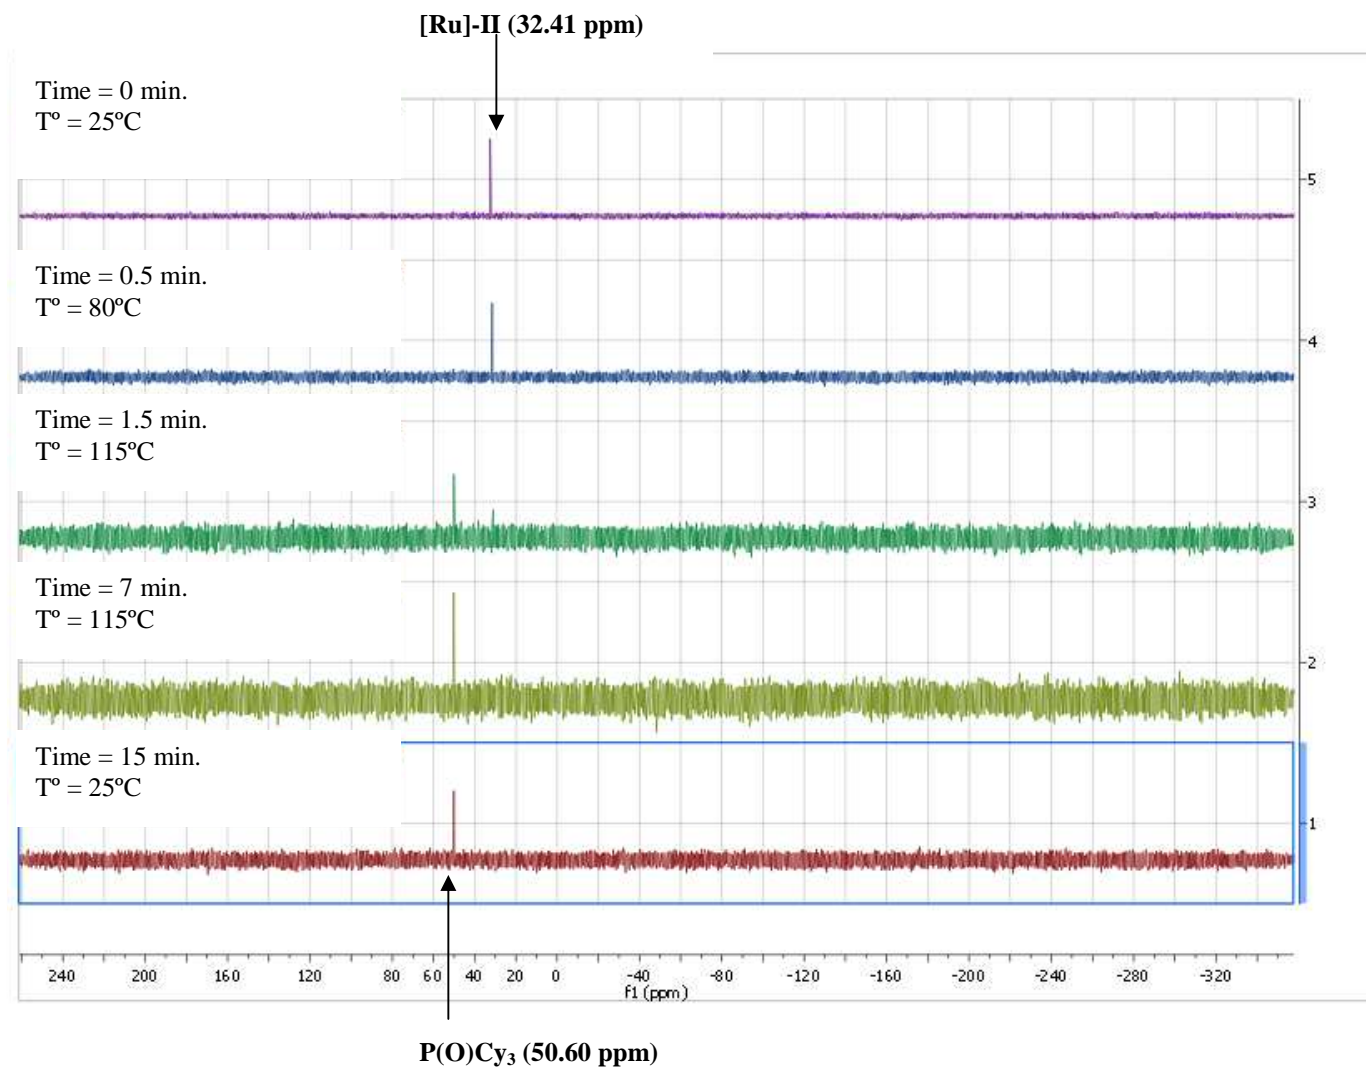

**$^1\text{H}$  of crude modified species conducted down to -35 ppm (DMF- $d_7$ ) (300 MHz):**

CAT MODIF DMF-D7 300MHz

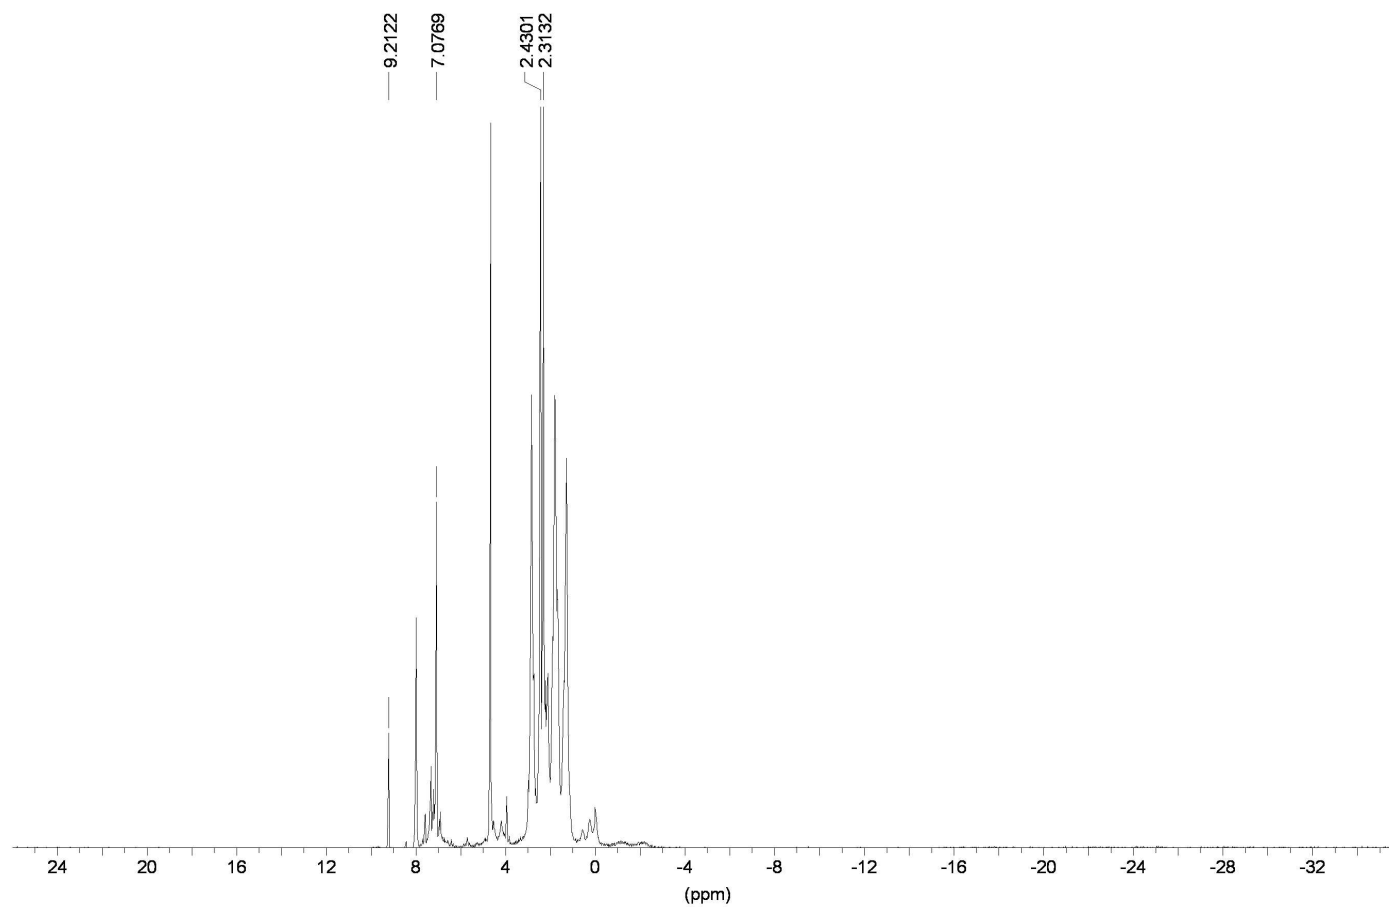

**IR spectrum of catalyst [Ru]-II modification reaction mixture after 7 min:**

PerkinElmer Spectrum Versión 10.02.00  
lunes, 19 de septiembre de 2011 14:56

Analista  
Fecha

Administrator  
lunes, 19 de septiembre de 2011 14:56

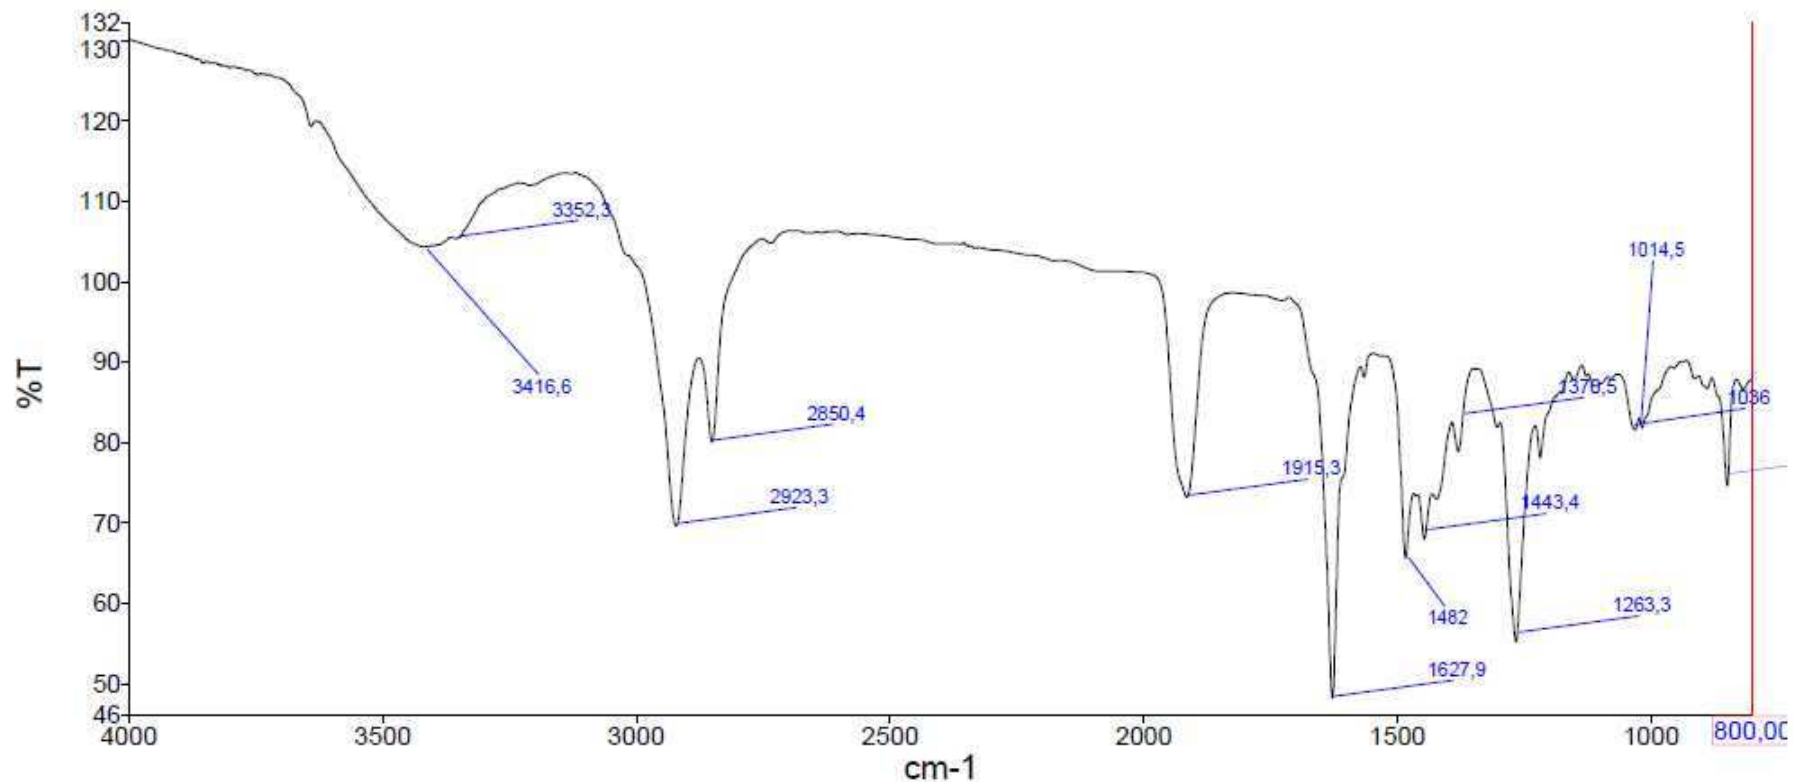

**IR spectrum of catalyst [Ru]-II modification reaction mixture after 15 min:**

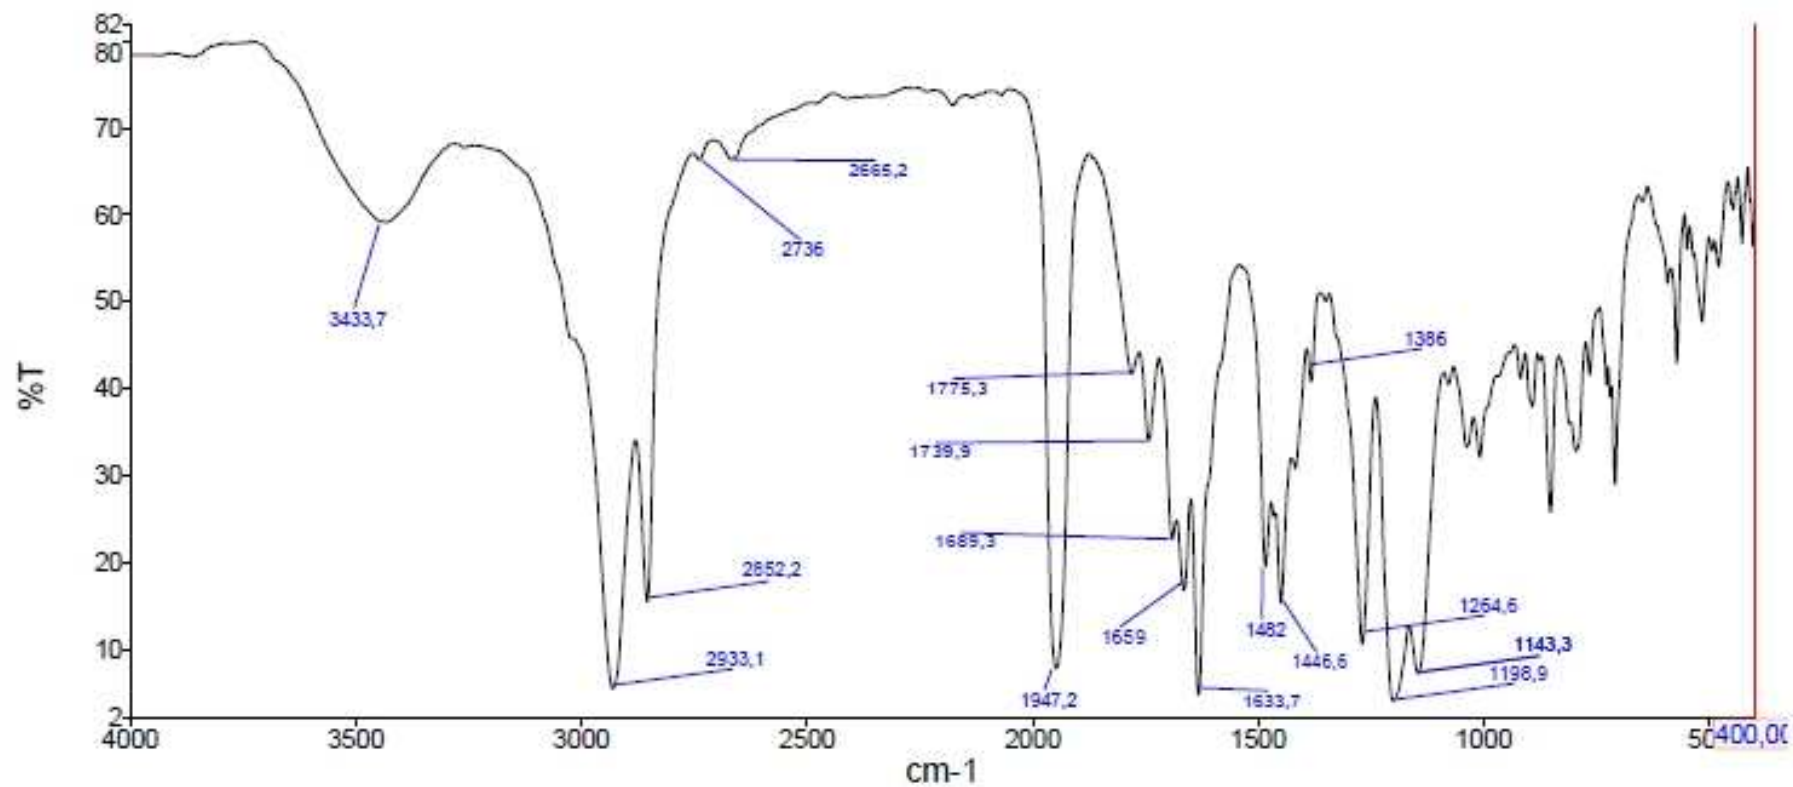

Administrator 01 58,96 %T Muestra 001 Por Administrator Fecha miércoles, junio 13 2012



### MS spectrum of catalyst [Ru]-II modification reaction mixture after 7 min and 15 min:

#### Acquisition Parameter

|                   |                |              |            |                          |          |
|-------------------|----------------|--------------|------------|--------------------------|----------|
| Ion Source Type   | ESI            | Ion Polarity | Negative   | Alternating Ion Polarity | off      |
| Mass Range Mode   | Std/Normal     | Scan Begin   | 100 m/z    | Scan End                 | 1500 m/z |
| Capillary Exit    | -84.9 Volt     | Skim 1       | -17.4 Volt | Trap Drive               | 48.2     |
| Accumulation Time | 100000 $\mu$ s | Averages     | 8 Spectra  | Auto MS/MS               | off      |

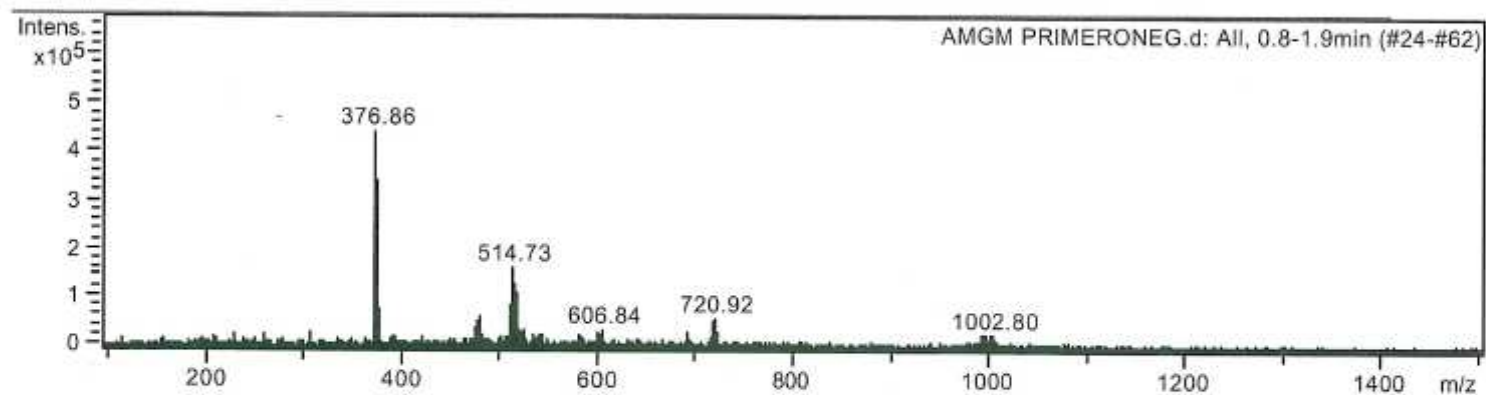

| #  | m/z    | I      | I % |
|----|--------|--------|-----|
| 1  | 376.86 | 432528 | 100 |
| 2  | 377.84 | 97711  | 23  |
| 3  | 378.86 | 337628 | 78  |
| 4  | 379.83 | 73423  | 17  |
| 5  | 482.75 | 59099  | 14  |
| 6  | 513.69 | 81880  | 19  |
| 7  | 514.73 | 162090 | 37  |
| 8  | 515.69 | 108420 | 25  |
| 9  | 516.67 | 125141 | 29  |
| 10 | 518.73 | 105765 | 24  |

---

**Acquisition Parameter**

|                   |            |              |           |                          |          |
|-------------------|------------|--------------|-----------|--------------------------|----------|
| Ion Source Type   | ESI        | Ion Polarity | Positive  | Alternating Ion Polarity | off      |
| Mass Range Mode   | Std/Normal | Scan Begin   | 100 m/z   | Scan End                 | 2000 m/z |
| Capillary Exit    | 91.6 Volt  | Scan 1       | 22.9 Volt | Trap Drive               | 56.5     |
| Accumulation Time | 100 µs     | Averages     | 8 Spectra | Auto-MS/MS               | off      |

---

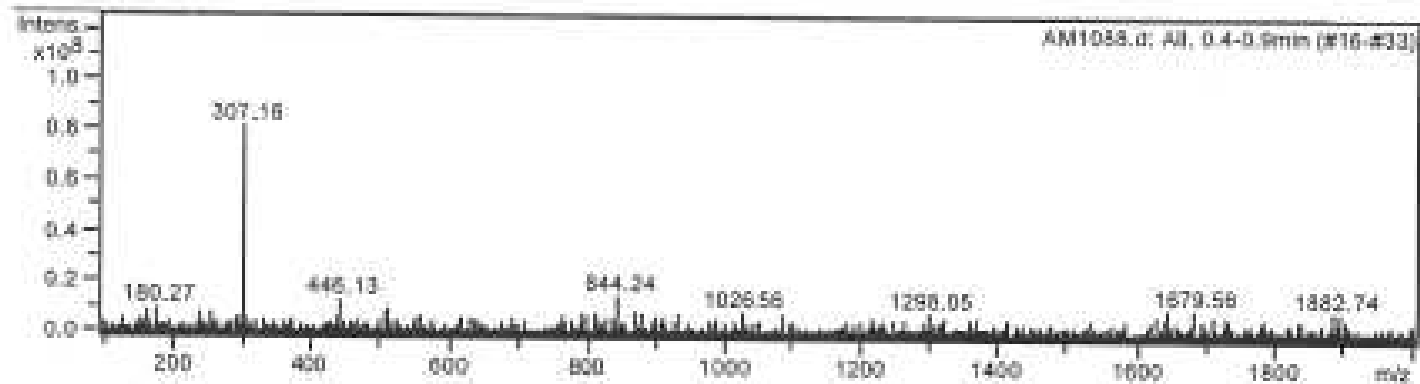

| #  | m/z     | I        | I%  |
|----|---------|----------|-----|
| 1  | 180.27  | 8914214  | 11  |
| 2  | 307.16  | 80015434 | 100 |
| 3  | 308.16  | 16408679 | 21  |
| 4  | 445.13  | 12341977 | 15  |
| 5  | 513.48  | 9301282  | 12  |
| 6  | 844.24  | 14321343 | 18  |
| 7  | 1026.56 | 9889929  | 12  |
| 8  | 1679.58 | 10028928 | 13  |
| 9  | 1882.74 | 8938813  | 11  |
| 10 | 1882.38 | 8928759  | 11  |

---

**Isolation of 1,3-bis-(2,4,6-trimethylphenyl)imidazolinium chloride:** Catalyst [Ru]-II (80 mg, 0.094 mmol) was placed in a flame-dried two-necked flask, and two cycles of vacuum-argon were performed. Anhydrous DMF (2 mL) was added and the suspension was heated at 130 °C for 12 min. The solvent was eliminated under reduced pressure (1 mbar, 80 °C), the dark oily residue was cooled to 4 °C and solved in cold toluene (0.8 mL). Cold hexane was added until a black oily residue precipitated and the supernatant was removed. The oil was washed twice with toluene (0.5 mL), hexane (2 mL) and dried under vacuum, affording 21 mg of a black oil.  $^1\text{H}$  NMR (700 MHz,  $\text{CD}_2\text{Cl}_2$ )  $\delta$  9.21 (bs, 1H), 7.04 (s, 4H), 4.40 (bs, 4H), 2.45 (s, 12H), 2.35 (s, 6H);  $^{13}\text{C}$  NMR (175 MHz,  $\text{CD}_2\text{Cl}_2$ )  $\delta$  160.7, 140.6, 135.0, 130.2, 130.0, 53.5, 21.1, 18.3.

**1,3-bis-(2,4,6-trimethylphenyl)imidazolinium chloride <sup>1</sup>H RMN spectrum:**

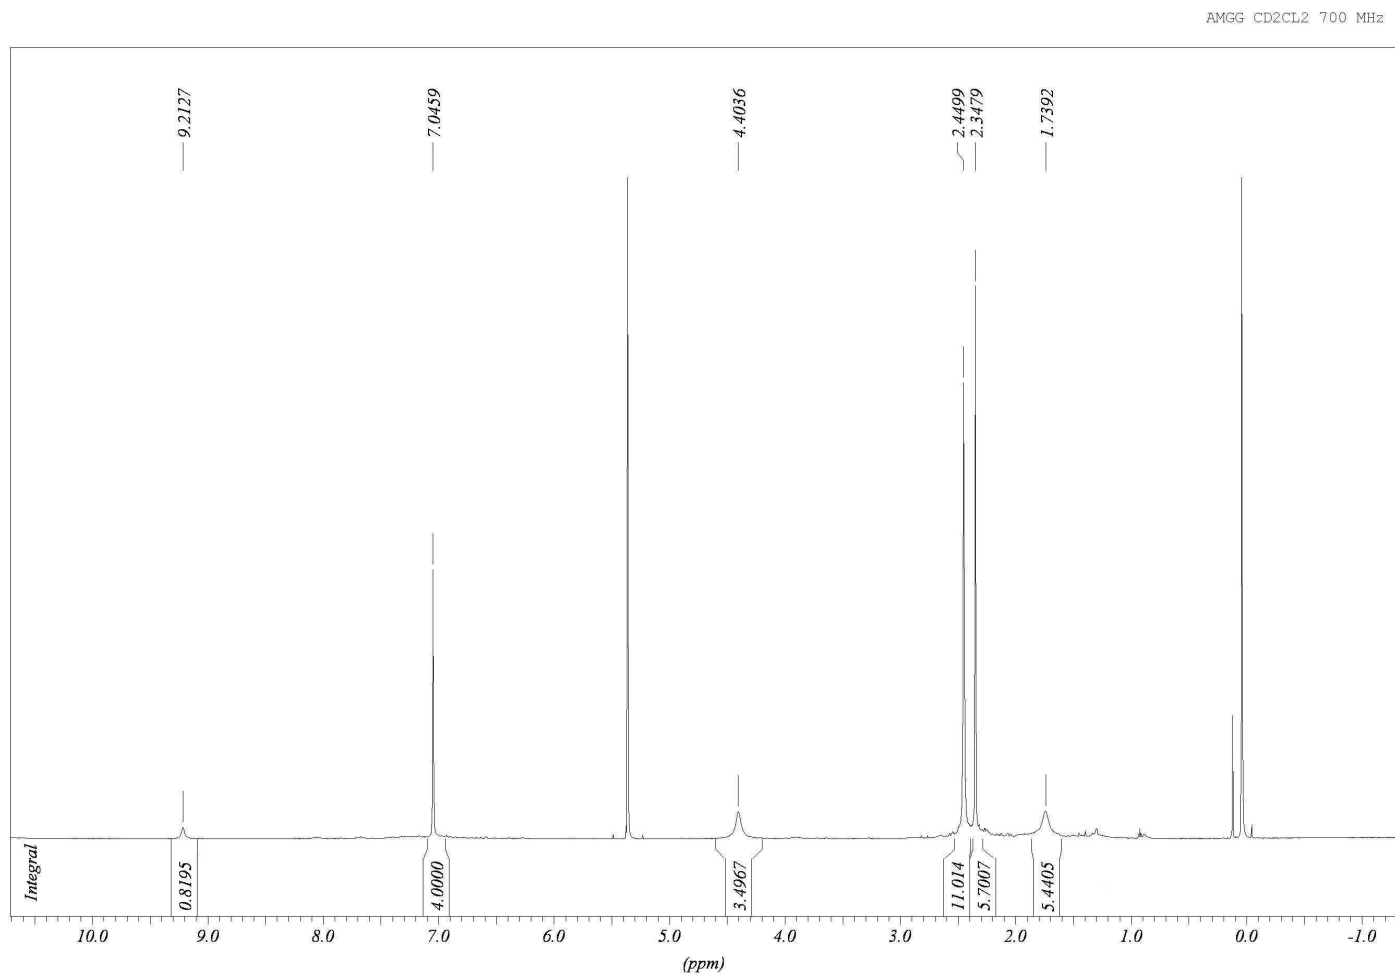

**1,3-bis-(2,4,6-trimethylphenyl)imidazolinium chloride <sup>13</sup>C RMN spectrum:**

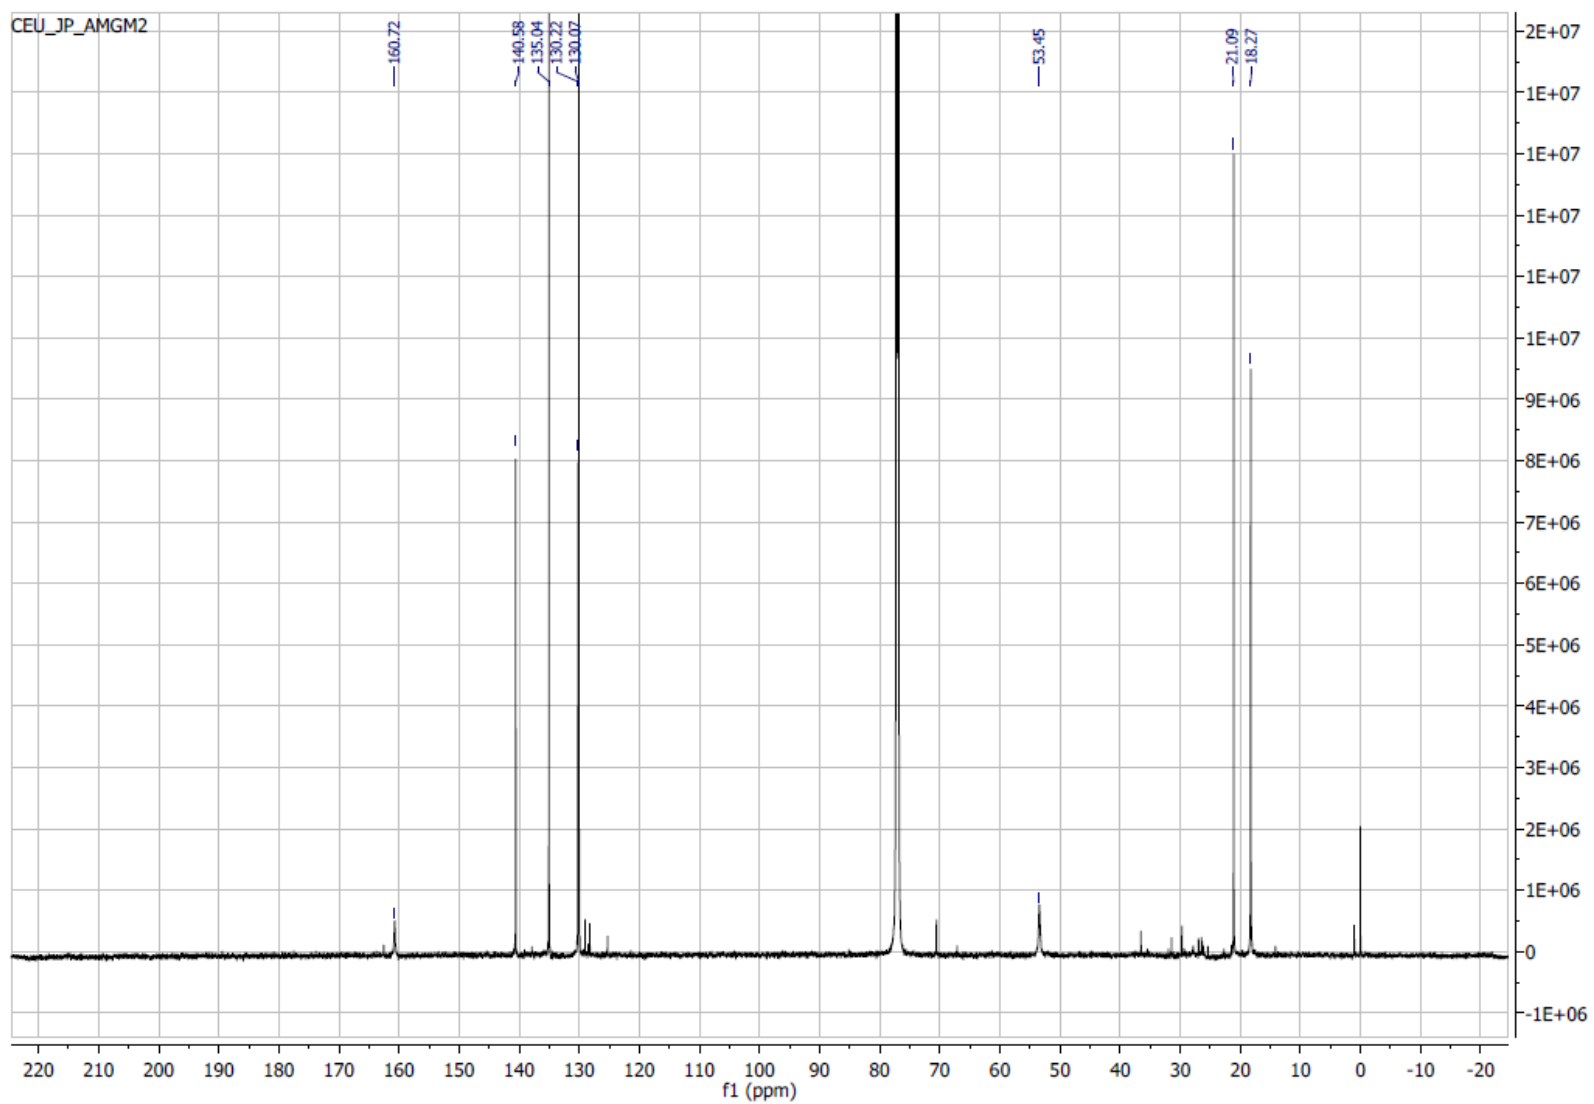

Supplement: c2ob07185a_2.pdf [file c2ob07185a_2.pdf]
